# 1 **Loss of MECP2 leads to telomere dysfunction and neuronal stress**

2 **Ohashi M, Lee P, Allen D, Fu K, Vargas B, Cinkornpumin J, Salas C, Park, J, Germanguz I, Chronis**  
3 **K, Kuoy E, Wu T, Lin K, Xiao AZ, Chen L, Tran S, Xiao, G, Lin L, Jin P, Pellegrini M, Plath K@ and**  
4 **Lowry WE@**

5

6 Department of Molecular Cell and Developmental Biology, UCLA

7 Department of Biological Chemistry, UCLA

8 Eli and Edythe Broad Center for Regenerative Medicine, UCLA

9 Molecular Biology Institute, UCLA

10 Stem Cell Center and Department of Genetics, Yale University

11 Department of Human Genetics, Emory University

12

13 @ To whom correspondence should be addressed/lead contact

14 William Lowry and Kathrin Plath

15

16

17

18

19

20

21

22

23

24

25

26

27

28 **Abstract**

29 To determine the role for mutations of MECP2 in Rett Syndrome, we generated isogenic  
30 lines of human iPSCs (hiPSCs), neural progenitor cells (NPCs), and neurons from  
31 patient fibroblasts with and without MECP2 expression in an attempt to recapitulate  
32 disease phenotypes *in vitro*. Molecular profiling uncovered a reduction of 5hmC,  
33 increased expression of subtelomeric genes including TERRA (a long non-coding RNA),  
34 and shortening of telomeres in the absence of MECP2 in hiPSCs, NPCs, and Neurons.  
35 Neurons made without MECP2 show signs of stress, including induction of gamma-  
36 H2aX, p53, and senescence, which are typical molecular responses to telomere  
37 shortening. The induction of p53 appeared to affect dendritic branching in Rett neurons,  
38 as p53 inhibition restored dendritic complexity. Examination of Rett patient brains  
39 uncovered similar molecular phenotypes suggesting that our disease-in-a-dish model  
40 yielded insights into human Rett Syndrome patient phenotypes and point towards a role  
41 for MECP2 in regulating telomere function.

42

43

44

45

46

47

48

## 49 Introduction

50 Rett Syndrome is a disease associated with loss of function mutations in the gene  
51 MECP2, which was originally identified as encoding a methylated DNA binding protein<sup>1-</sup>  
52 <sup>3</sup>. Patient symptoms include microcephaly, intellectual disability, facial dysmorphia, and  
53 seizure activity<sup>4,5</sup>. Studies in murine models recapitulate many of the patient  
54 phenotypes and have recently identified a role for MECP2 particularly in inhibitory  
55 neurons<sup>6-9</sup>. These studies demonstrated that loss of MECP2 can lead to defects in  
56 transcription<sup>10-12</sup>, dendritic branching<sup>13</sup>, nuclear size<sup>3</sup>, and AKT signaling<sup>14</sup>.

57

58 MECP2 is known to bind methylated DNA (both 5mC and 5hmC)<sup>1,2,15,16</sup>, and the loss of  
59 MECP2 was shown to affect 5hmC levels in at least one portion of the murine brain.  
60 MECP2 has also been described as a transcription factor with specific targets<sup>10,11,13</sup>,  
61 and more broadly as either a transcriptional activator<sup>14</sup> or repressor<sup>17-20</sup>. However,  
62 despite decades of research on MECP2, it is still unclear how mutations in this protein  
63 lead to patient symptoms<sup>3,14,21-23</sup>. To confirm findings made in other models and further  
64 study these in a human system, some have turned to modeling Rett Syndrome *in vitro*  
65 by taking advantage of Disease in a dish approaches. This involves making hiPSCs  
66 from patient somatic cells, or using genome engineering to introduce mutations into WT  
67 human pluripotent stem cells. In either case, the pluripotent stem cells created are then  
68 differentiated toward the neural lineage, and then comparisons can be made between  
69 cells that express MECP2 or lack it.

70

71 Some of these studies have even taken advantage of isogenically controlled lines to  
72 identify both transcriptional and electrophysiological effects of loss of MECP2 in human  
73 in vitro models<sup>14,24</sup>. In the current study, we also sought to mitigate the effect of genetic  
74 background and variability of differentiation by taking advantage of several isogenic  
75 lines of hiPSCs that either express the WT allele or the mutant allele leading to cells  
76 that express or lack MECP2<sup>25</sup>. This allowed for detailed molecular analyses of hiPSCs,  
77 NPCs and neurons with and without MECP2 under the same genetic background. In  
78 addition, several lines were made and analyzed in each category to avoid variance in  
79 differentiation potential amongst isogenic lines. Furthermore, isogenic lines were made  
80 from two independent patients with different mutations to highlight only those  
81 phenotypes associated with loss of MECP2 expression and not genetic background or  
82 variance in hPSC differentiation. Finally, we validated many of these findings using  
83 siRNA silencing of MECP2 in WT cells of a distinct genetic background.

84

85 In comparing multiple lines of cells, it is clear from our data that loss of MECP2 leads to  
86 profound molecular alterations specifically towards the ends of chromosomes due to a  
87 decrease of 5-hydroxymethylation, induction of subtelomeric gene expression, and  
88 shortening of telomeres. The telomere defects that arise in neurons appear to be  
89 related to defects in dendritic branching that are a hallmark of the patient disease.  
90 Together, these results define a heretofore unappreciated role for MECP2 in molecular  
91 regulation towards the ends of chromosomes.

92

## 93 **Results**

### 94 **An isogenic model of Rett Syndrome *in vitro***

95 To determine how loss of MECP2 expression leads to defects in the nervous system we  
96 generated a disease-in-a-dish model using iPSCs. Cognizant of the fact that  
97 differentiation from hPSCs is highly variable across individual lines, culture conditions,  
98 and time, we developed an isogenic model to study Rett Syndrome *in vitro* to remove  
99 the confound of genetic background<sup>25</sup>. Because female patients with Rett Syndrome  
100 are usually heterozygous for mutant alleles of *MECP2*, fibroblasts isolated from these  
101 patients display a mosaic pattern where roughly half the cells express either the mutant  
102 or WT allele. This is shown in Figure 1A, where fibroblasts isolated from two patients  
103 with distinct mutant alleles of MECP2 (R982 and R567) showed that roughly half the  
104 cells express MECP2 while the other half lacked detectable amounts of this protein.  
105 One of these mutant alleles is predicted to lead to a premature stop codon, while the  
106 other leads to failed transcriptional termination. Reprogramming to iPSCs using a small  
107 set of transcription factors has been shown to happen at the clonal level, such that  
108 individual reprogramming events in single fibroblasts generate isolated hiPSC clones<sup>26</sup>.  
109 Therefore, reprogramming of mosaic fibroblast cultures from two different patients  
110 generated single hiPSC clones that either expressed MECP2 protein or lacked it (Fig  
111 1B) (Method described in a previous study<sup>27</sup>). In addition, our work and that of others  
112 has shown that under standard conditions, the inactive X chromosome in human  
113 fibroblasts does not reactivate upon reprogramming to the pluripotent state<sup>25,27,28</sup>, which  
114 is distinct from murine reprogramming<sup>29</sup>.

115

116 Thus, we were able to create multiple lines of hiPSCs with and without MECP2 from  
117 individual patients and thereby control for differences in genetic background (shown in  
118 Fig 1B are clones made from patient 982, clones from 567 look similar). The hiPSCs  
119 generated from fibroblasts of both patients appeared to be unaffected by the lack of  
120 MECP2, expressed all appropriate markers, and successfully generated teratomas  
121 upon injection into the testes of immunocompromised mice, consistent with previous  
122 hiPSC models for loss of MECP2 (Fig 1-figure supplement 1)<sup>14,30-32</sup>. Lack of MECP2 in  
123 patient- derived cells and specificity of antibody was also confirmed by western blot (Fig  
124 1-figure supplement 2A). Importantly, we never observed reactivation of the silenced X  
125 chromosome that would have resulted in re-expression of the WT allele of MECP2 in  
126 any cultures regardless of differentiation status or passage. This is consistent with  
127 previous data showing that despite evidence for erosion of isolated portions of the  
128 silenced X chromosome<sup>33</sup>, the portion containing the MECP2 locus was not affected by  
129 reprogramming or differentiation.

130

131 As Rett Syndrome primarily afflicts the nervous system and MECP2 is most highly  
132 expressed in neurons, we first generated neural progenitor cells from all of the hiPSCs  
133 lines following standard protocols<sup>34</sup>. Across at least two lines per patient with and  
134 without MECP2, we measured the rate of neuralization, the morphology of NPCs, and  
135 expression of typical marker genes. We were unable to detect consistent differences in  
136 these properties between multiple clones of both WT and MECP2- lines derived from

137 both patients (Fig 1C and 1-figure supplement 2B). Furthermore, the growth rate of  
138 NPCs with and without MECP2 was not consistently different in NPCs made from either  
139 patient (Fig 1-figure supplement 2C). Next, the NPCs were further differentiated by a  
140 non-directed differentiation approach that yields both neurons and glia (growth factor  
141 withdrawal<sup>35</sup>) (Fig 1D). Both the neurons and glia made from NPCs adopted typical  
142 morphologies regardless of MECP2 expression, and all NPCs from both patients  
143 produced neurons and glia at the same rate (Fig 1-figure supplement 2D and figure  
144 supplement 2E).

145

146 Previous studies have also shown that loss of MECP2 in neurons can lead to a  
147 decrease in AKT signaling<sup>14</sup>. A similar pattern was observed here in mutant neurons  
148 generated from Rett patient hiPSCs as measured by phosphorylation of AKT and S6,  
149 while hiPSCs themselves did not seem to be affected by loss of MECP2 (Fig 1E).  
150 Dendritic complexity has been shown extensively to be reliant on MECP2 expression in  
151 various models of Rett Syndrome, and we found a statistically significant decrease in  
152 complexity in neurons made in the absence of MECP2 by Sholl assay (Fig 1F). In  
153 addition, we observed qualitative differences in basic neuronal morphology between WT  
154 and mutant neurons, where the neurons lacking MECP2 had shorter, thicker processes,  
155 and their soma was not as well defined.

156

157

158 **Loss of MECP2 leads to disruption of hydroxymethylation of DNA**

159 Because MECP2 is a well-established methylated DNA binding protein particularly for 5-  
160 hydroxymethylcytosine (5hmC)<sup>16</sup>, we analyzed patterns of this mark across the genome  
161 in the presence or absence of MECP2 with Methylation-dependent Immunoprecipitation  
162 (MEDIP)<sup>41-44</sup> in hiPSCs. We used a stringent criterion to identify differentially  
163 hydroxymethylated regions (DhmRs), whereby the indicated regions had to differ by 0.2  
164 per million reads per base pair (Fig 2A). We still observed a large number of  
165 differentially hydroxymethylated regions (DhmRs) due to the loss of MECP2 in two  
166 clones each from two independent patients (982.15 and 982.17 vs 982.16 and 982.18;  
167 567.24 and 567.26 vs 567.25).

168

169 The loss of MECP2 led to many more hypomethylated regions than hypermethylated  
170 regions, a strong bias that indicated that MECP2 somehow promotes or stabilizes  
171 hydroxymethylation (Fig 2B). This hypomethylation is more clearly identified by plotting  
172 the Delta Methylation between the WT and MUT clones from both patients. Both  
173 patients showed a dramatic shift towards loss of methylation across both clones (Fig  
174 2B). Mapping 5hmC-DhmRs relative to genomic features indicated a de-enrichment  
175 away from intergenic regions and enrichment at coding exons (Fig 2C indicated by \*).  
176 When mapping the 5hmC-DhmRs across chromosomal locations, they were highly  
177 enriched towards the ends of chromosomes (Fig 2D). In addition, the effect of loss of  
178 MECP2 on 5hmC levels was strong enough to be observed by immunostaining in  
179 hiPSCs made from both patients (Fig 2E and F).

180



## 181 **Loss of MECP2 affects the transcriptome of neurons**

182 It has been suggested that loss of MECP2 only affects gene expression in neurons as  
183 opposed to the hPSCs and NPCs from which they were derived<sup>14</sup>. Coupled with the fact  
184 that 5hmC levels appear to be disturbed in MECP2 null hiPSCs, we sought to determine  
185 whether gene expression was affected in hiPSCs, NPCs or neurons in this patient  
186 derived *in vitro* model. We therefore proceeded with RNA seq (>120 million reads per  
187 sample) of hiPSC, NPC and interneuron cultures. With such sequencing depth, it was  
188 possible to analyze the RNA-seq reads for the known mutations present in the patients  
189 from which these lines were made (Fig 3-figure supplement 1). This analysis  
190 demonstrated that each line studied expressed strictly either the WT or mutant allele of  
191 MECP2, and that XCI status was unchanged even after extensive differentiation to  
192 neurons.

193

194 To optimize the search for molecular effects of loss of MECP2 in hiPSCs, NPCs or  
195 neurons, we generated more defined neuronal cultures by following the newly  
196 established 3i (three inhibitor) method to create populations of human interneuron  
197 progenitors (Fig 3-figure supplement 1A) and interneurons (Fig 3-figure supplement  
198 1B)<sup>45</sup>. Interneurons are particularly relevant in the study of Rett Syndrome as  
199 interneuron-specific deletion of *Mecp2* in mice recapitulates many of the disease  
200 symptoms<sup>6,8,46,47</sup>. We validated the purity and quality of differentiation at each step by  
201 immunostaining for markers typical of particular cell types (SOX2, SOX1 and NESTIN  
202 as well as FOXG1 and NKX2.1 for NPCs; and Tuj1, MAP2 and GABA for interneurons)

203 in both WT and MUT cultures followed by quantification (not shown). We first assessed  
204 whether interneurons lacking MECP2 also showed diminished dendritic branching. In  
205 fact, in patient-derived interneurons made by 3i, defects in dendritic branching as  
206 measured by the number of endpoints were clearly observed (Fig 3A).

207

208 First, we quantified the expression level of MECP2 in WT cells across these three  
209 stages of development and found that the average RPKM was 3.1 for hiPSCs, 4.3 for  
210 NPCs, and 7.75 for interneuron cultures. This is consistent with consensus that MECP2  
211 is enriched in neuronal cells, but also demonstrates that it could potentially be relevant  
212 to hiPSC and NPC physiology as well. However, high stringency analyses (FDR <0.05)  
213 of the RNA-seq data yielded very few gene expression changes due to loss of MECP2  
214 in hiPSCs or NPCs derived from Rett patients (Fig 3B), consistent with Li et al<sup>14</sup>. On the  
215 other hand, interneuron cultures made from patient 982 showed many gene expression  
216 changes when comparing two individual WT and MUT clones (Fig 3B). Gene ontology  
217 analysis uncovered many neuronal physiology- related pathways were downregulated  
218 due to loss of MECP2 in neurons, while genes associated with extracellular remodeling  
219 and cell migration appeared to be induced (Fig 3C).

220

221 We then mapped the interneuron DEGs according to chromosomal location and found  
222 an interesting pattern whereby genes that many of the upregulated genes in the  
223 absence of MECP2 were enriched towards the ends of chromosomes (Fig 3D).  
224 Moreover, the same pattern emerged in analysis of low stringency DEGs (p value

225 <0.05) from hiPSCs and NPCs lacking MECP2 (Fig S4C and S4D) for the upregulated  
226 genes. We did not observe this pattern for the downregulated genes in hiPSCs, NPCs  
227 and neurons. These data suggested that MECP2 could play a role in gene regulation  
228 particularly at the ends of chromosomes, and was consistent with the pattern observed  
229 for hypomethylation of 5hmC in the absence of MECP2. Finally, there was also a small,  
230 but statistically significant overlap of 5hmC-DhMRs with DEGs in hiPSCs suggesting a  
231 link between the two (Fig 3E).

232

233 We validated a number of the subtelomeric gene expression changes induced by loss of  
234 MECP2 by RT-PCR in independent preparations of hiPSCs, NPCs and Neurons (Fig  
235 4A). Many of the subtelomeric genes upregulated are typically not expressed at all in  
236 hiPSCs, NPCs or neurons, thus the loss of MECP2 led to an aberrant expression  
237 pattern as opposed to a reinforcement or suppression of a typical pattern in these cell  
238 types. Furthermore, the subtelomeric genes that were induced in the absence of  
239 MECP2 were still typically present at less than 1 RPKM, clouding the potential  
240 physiological consequence of the induction of these genes.

241

242 To determine whether these effects were specific to the genetic background of the cells  
243 used or whether defects in reprogramming to the pluripotent state in the absence of  
244 MECP2 affected the downstream gene expression pattern, we silenced MECP2 in WT  
245 NPCs and assessed gene expression patterns in this context. Several different siRNA  
246 targeting oligos were assayed for their ability to silence MECP2 by RT-PCR, western

247 blot, and immunostaining (Fig 4-figure supplement 1). Silencing of MECP2 in either  
248 WT-NPCs derived from other pluripotent stem cells or WT-NPCs derived from 15 week  
249 old fetal Medial Ganglionic Eminence (MGE) brain tissue, a source of cortical  
250 interneuron progenitors<sup>35</sup>, led to strong induction of expression of subtelomeric genes  
251 (Fig 4B and C).

252

253 Recently, it was discovered that a long non-coding RNA (lncRNA) is also transcribed  
254 from the subtelomeric domain into the telomeric sequence itself<sup>48-52</sup>. This lncRNA is  
255 both known to be induced by telomere shortening and to potentially negatively regulate  
256 telomere length by competing for telomere priming within telomerase<sup>51-53</sup>. TERRA  
257 transcripts are difficult to detect by RNA-seq because they contain mostly telomeric  
258 repeat sequences. This also makes it difficult to design PCR primers that are specific to  
259 a single TERRA transcript. However, we used established RT-PCR primers<sup>51,52</sup> to show  
260 that, similar to many subtelomeric genes, several TERRAs were strongly induced in the  
261 absence of MECP2 in isogenic derivatives (hiPSCs, NPCs, interneurons) (Fig 4D). In  
262 addition TERRA was induced in WT-NPCs derived from pluripotent stem cells or from  
263 tissue (Fig 4D).

264

## 265 **Loss of TET activity phenocopies loss of MECP2**

266 To assess the possibility that MECP2 regulation of 5hmC levels is linked to the  
267 regulation of subtelomeric gene expression, we targeted TET enzymes by siRNA. TET  
268 enzymes convert 5-methylcytosine (5mC) to 5-hydroxymethylcytosine (5hmC), and their

269 deletion or downregulation is known to severely diminish levels of 5hmC<sup>44,54</sup>. According  
270 to RNA-seq, the three TET enzymes are expressed similarly in both WT and MUT  
271 patient neurons (Average RPKM: TET1, 4.1; TET2, 1.6; TET3, 3.6). RT-PCR  
272 demonstrated the ability to silence TET 1, 2, and 3 isoforms using a combination of  
273 siRNA oligos in neurons (Fig 4E). Assaying for subtelomeric genes, including TERRA  
274 transcripts demonstrated that TET inhibition led to strong increases in not only  
275 subtelomeric coding genes, but also TERRA transcripts (Fig 4F), in a similar manner as  
276 in loss of MECP2, suggesting a link between 5hmC and subtelomeric gene expression.  
277 Together, these data confirm that loss of MECP2 can lead to induction of subtelomeric  
278 genes, including TERRA, and that this dysregulation could be due to an effect on 5-  
279 hydroxymethylation. Left unclear is how the loss of MECP2 leads to changes in 5hmC  
280 levels.

281

## 282 **Loss of MECP2 leads to telomeric abnormalities**

283 One of the most established functions for TERRAs is their ability to interfere with  
284 telomerase function by acting as a competitive inhibitor for telomere priming<sup>55</sup>, leading  
285 to shortened telomeres. In addition, others have shown that decreased 5hmC in murine  
286 embryonic stem cells can also lead to telomere shortening<sup>56</sup>, and, as shown here, loss  
287 of MECP2 led to decreased 5hmC in hiPSCs (Fig 2). Therefore, we attempted to  
288 determine the physiological consequence of TERRA induction in the absence of  
289 MECP2. qPCR for telomere length in fact showed that cells without MECP2 showed  
290 shorter telomeres, regardless of their stage of differentiation (Fig 5A) (a complete list of

291 cell lines used for these analyses is provided in Supplemental Table 1). NPCs with  
292 transient siRNA knockdown of MECP2 also showed shorter telomeres, indicating that  
293 this effect was not simply due to defects during reprogramming or differential expansion  
294 of cell lines (Fig 5A). Quantitative fluorescence in situ hybridization (qFISH) was used  
295 to determine telomere length at the single cell level. qFISH demonstrated that NPCs  
296 without MECP2 showed significantly shorter telomeres relative to centromeric regions  
297 (Fig 5B). To further validate these findings we performed southern blot with a telomere  
298 probe on NPCs with and without MECP2 and found telomere shortening in cells lacking  
299 MECP2 (Fig 5C). These data point towards telomere erosion in the absence of  
300 MECP2.

301

302 Telomere dysfunction is known to be present in some cancers, and also in cells driven  
303 to senescence due to telomere shortening, but this process has yet to be implicated in  
304 Rett Syndrome etiology<sup>57-60</sup>. Telomere dysfunction is characterized by short telomeres,  
305 induction of PML, gammaH2aX, and p53<sup>61</sup>. We assayed for evidence of telomere  
306 dysfunction by immunostaining for gamma-H2aX (Fig 6A) and PML (Fig 6B) in NPCs.  
307 WT NPCs with silencing of MECP2 by siRNA and neurons lacking MECP2 also showed  
308 clear induction of these marks (data not shown), consistent with telomere dysfunction  
309 induced by the absence of MECP2.

310

311 **Induction of P53 and senescence pathways in the absence of MECP2**

312 It is well established that shortening of telomeres puts significant stress on cells, which  
313 can lead to senescence or even apoptosis<sup>55,62-64</sup>. As Rett Syndrome is caused by  
314 neuronal defects specifically, we determined how neurons lacking MECP2 respond to  
315 telomere shortening at the molecular and physiological level. Cells under stress due to  
316 telomere shortening are known to induce p53, which can then activate various response  
317 pathways downstream such as DNA repair, senescence, and apoptosis<sup>65</sup>. Interestingly,  
318 p53 induction due to telomere shortening was previously shown to cause defects in  
319 dendritic branching<sup>64,66</sup>, which is also the dominant phenotype in Rett Syndrome.  
320 Immunostaining for p53 in neurons with and without MECP2 showed a strong increase  
321 in p53 protein in the absence of MECP2 (Fig 6C). p21, a transcriptional target gene of  
322 p53, was also induced in MECP2 null neurons at the protein level (Fig 6C). In addition,  
323 telomere shortening in NPCs due to overexpression of the Progerin allele, which is  
324 associated with accelerated aging also induced p53 expression (Fig 6-figure  
325 supplement 1E).

326

327 Because telomere shortening is known to also drive cellular senescence, we looked for  
328 signs of defective proliferation *in vitro*. While attempting to make clones of fibroblasts  
329 from patients with Rett syndrome, we repeatedly found that clones lacking MECP2 did  
330 not expand well after a passage (14 MECP2 null clones were created, none expanded),  
331 while clones expressing the WT allele expanded without problem (42 MECP2+ clones  
332 were created, and 4 out of 4 all expanded). To determine whether MECP2 null  
333 fibroblasts encounter senescence, we performed assays to detect endogenous beta-

334 galactosidase, which is known to be a hallmark of this process<sup>67</sup>. Indeed, MECP2 null  
335 fibroblasts showed strong activity in this senescence assay (Fig 6D).

336

337 We did not encounter such difficulties with clonal expansion once hiPSCs or hiPSC-  
338 derived NPCs were made from patients, presumably because during reprogramming,  
339 telomerase is strongly induced to restore telomere length at least beyond the critical  
340 threshold<sup>68-73</sup>. In fact, our RNA-seq data showed that hiPSCs made from patients had  
341 very high expression of TERT, and NPCs still expressed moderate levels, while neurons  
342 did not express appreciable levels (average RPKM for TERT: hiPSC, 8.8; NPC, 1.6;  
343 neuron, 0.006). Importantly, the same endogenous galactosidase activity assay on  
344 interneurons showed a dramatic increase in senescence activity in neurons lacking  
345 MECP2 (Fig 6E). On the other hand, similar assays on NPCs lacking MECP2 did not  
346 show any induction of senescence (data not shown). Together, these data indicate that  
347 loss of MECP2 leads to the generation of neurons that show evidence of telomere  
348 dysfunction.

349

350 Probing RNA-seq data, we also found that MECP2 null interneuron cultures showed a  
351 strong increase in a group of genes that are known to be induced by senescent cells,  
352 known as the Senescence Associate Secretory Program (SASP). Fig 6-figure  
353 supplement 1A shows that SASP genes were strongly induced in MECP2 mutant  
354 neurons, providing further evidence of a senescence phenotype. These senescence  
355 phenotypes are also intriguing in light of the transcriptional data suggesting an increase



356 in aging- related genes by gene ontology analysis (Fig 3C). The only previous report  
357 linking MECP2 loss to senescence was performed by partial silencing of this protein in  
358 mesenchymal stem cells, but the results were consistent with those shown here for  
359 patient derived MECP2 null fibroblasts<sup>74</sup>.

360

361 To demonstrate whether the induction of senescence and p53 observed here was due  
362 to telomere shortening as opposed to other molecular phenotypes due to loss of  
363 MECP2, we deliberately shortened telomeres in otherwise wildtype NPCs. We took  
364 advantage of the progerin allele of the Lamin-A gene. This truncated allele is similar to  
365 what is found in patients suffering from Progeria, a premature aging disorder typified by  
366 telomere shortening<sup>75,76</sup>. Induction of the progerin allele by lentiviral infection of cDNA  
367 in WT NPCs showed a significant telomere shortening as expected (Fig 6-figure  
368 supplement 1B). In addition, induction of the progerin allele caused an increase in  
369 expression of the same subtelomeric genes and TERRA transcripts that were induced  
370 by the loss of MECP2 (Fig 6-figure supplement 1C and D). This was presumably due to  
371 the Telomere Position Effect, whereby telomere shortening is known to lead to induction  
372 of subtelomeric gene expression<sup>77,78</sup>. Importantly, progerin expression also led to a  
373 strong induction of p53 expression (Fig 6-figure 1E), consistent with what was observed  
374 in MECP2 null neurons.

375

376 **Blocking induction of P53 can rescue dendritic branching defects due to loss of**  
377 **MECP2**

378 Previous evidence from a murine model of telomere shortening as a result of loss of  
379 telomerase complex (TERT) led to defects in dendritic branching, and this effect was  
380 strictly dependent on induction of p53<sup>64</sup>. A more recent study also showed that  
381 experimentally aging the neural lineage with telomerase inhibition led to neurons with  
382 signs of aging, including reduced dendritic branching<sup>79</sup>. Therefore, we posited that  
383 inhibition of P53 in MECP2 null neurons with shortened telomeres could potentially  
384 restore appropriate dendritic branching.

385

386 To determine whether blocking the action of P53 could improve dendritic branching in  
387 MECP2 null interneurons, we took advantage of Pifithrin- $\alpha$ , a potent inhibitor of P53  
388 target gene activation<sup>80</sup>. Treatment of MECP2 null interneurons with Pifithrin- $\alpha$  showed  
389 evidence of p53 inhibition as measured by RT-PCR for GADD45<sup>65</sup>, a target gene  
390 important for DNA repair (Fig 6F). After 24-48 hours of p53 inhibition by Pifithrin- $\alpha$ ,  
391 MECP2 null interneurons appeared to adopt an improved neuronal morphology typified  
392 by increased physical distinction between the soma and neurites, longer, thinner  
393 neurites, as well as increased dendritic branching as shown and quantified in Fig 6F.  
394 These data provide evidence that neurons with shortened telomeres due to loss of  
395 MECP2 respond by inducing P53 activity, which then inhibits the formation of complex  
396 neuronal processes. In summary, our in vitro model in human neurons suggests that  
397 loss of MECP2 leads to aberrant molecular regulation at the ends of chromosomes,  
398 leading to telomere shortening and a resulting induction of cell stress pathways such as  
399 p53 and senescence (Fig 6G).

400

401 **Rett patient brains show evidence of telomeric dysfunction**

402 To determine whether any of the phenotypes discovered in this *in vitro* model of Rett  
403 Syndrome have relevance to patients afflicted with the disease, we acquired tissue  
404 specimens from Rett patients and aged matched controls. We first quantified the  
405 degree of chimerism of female Rett patient neurons due to skewing of X chromosome  
406 inactivation to determine the relative ratio of neurons that express MECP2 versus those  
407 that did not. One of the Rett patient brains showed roughly 75% of its neurons lacking  
408 MECP2, while others appeared to have less than 25% MECP2 null neurons (Fig 7A).  
409 Southern blotting of the patient brain with 75% mutant neurons compared to an aged-  
410 matched control demonstrated that this Rett brain had shorter telomeres (Fig 7B). We  
411 then measured telomere length by PCR from genomic DNA isolated from small  
412 specimens of brain tissue from a group of Rett patients, and found that some aged  
413 matched Rett patient brains showed small decreases in average telomere length (Fig  
414 7C), though not in every case (data not shown). Because of both the limited availability  
415 of Rett patient brains, and the variable chimerism of WT and MUT neurons within these  
416 Rett brains, perhaps it is not surprising that we were unable to detect trends across all  
417 brains analyzed using a method that cannot distinguish between WT and mutant cells.  
418 This chimerism, coupled with the known variability of telomere length across even  
419 normal individuals and even across brain regions and cell types precludes an accurate  
420 assessment of general telomere length differences in Rett brain until more samples  
421 become available for study.

422

423

424 On the other hand, we did find that the TERRA transcript was induced in nearly all Rett  
425 patient brains as measured by RT-PCR (Fig 7D), suggesting that all the Rett patients  
426 display dysregulation at the ends of their chromosomes. We did identify two Rett patient  
427 brains with a high proportion of MECP2 null neurons and subjected these to further  
428 investigation for signs of telomere dysfunction *in situ*. In patients 1815 and 5784,  
429 MECP2 null neurons showed a strong increase in both P53 and PML levels compared  
430 to adjacent neurons that expressed MECP2 (Fig 7E and F). This is consistent with the  
431 response to telomere shortening due to loss of MECP2 observed *in vitro*. These data  
432 are particularly intriguing in light of data showing that telomere shortening diminishes  
433 dendritic branching in various types of neurons and that this process can be dependent  
434 on p53 activity<sup>64,66</sup>.

435

## 436 **Discussion**

437 Taken together, these data demonstrate that loss of MECP2 leads to telomere  
438 shortening, which in neurons results in clear signs of stress such as H2aX induction,  
439 p53/p21 induction, and initiation of a senescence program, all of which suggest that  
440 neurons in Rett Syndrome could be in suboptimal health, leading to neurophysiological  
441 defects such as dendritic arborization<sup>13,22</sup>. Many of these phenotypes first observed in  
442 the *in vitro* model also appeared to be consistent with what could be observed in Rett  
443 patient brains, suggesting disease relevance for these findings.

444

445 It is curious that telomere defects have not been reported in previous models of Rett  
446 Syndrome. While one paper suggested that RNAi-mediated silencing of MECP2 could  
447 affect the telomeres of mesenchymal cells<sup>74</sup>, decades of work on Rett Syndrome have  
448 not uncovered a role for MECP2 in relation to telomeres in a wide variety of models  
449 such as various transgenic mouse line, human patient post-mortem analyses, *in vitro*  
450 human models. Our study certainly benefited from analyses of multiple isogenically  
451 controlled cells from two patients and from the single cell analyses of patients with both  
452 WT and MUT neurons in the same area of the brain. This allowed for high confidence  
453 comparisons without having to correct for genetic background, or differences in tissue  
454 preparation. In addition, the study of telomeres in MECP2 mutant mice could be  
455 hampered by the simple fact that telomeres from inbred mouse strains typically used for  
456 these studies are on average much longer than human telomeres. Therefore, it is  
457 possible that telomere shortening in murine models does not proceed to such an extent  
458 by which one would expect induction of p53 in murine models.

459

460 Patients with Rett Syndrome are typically characterized by a normal development at  
461 birth and subsequent failure to thrive leading to microcephaly and intellectual disability  
462 that develops with age. As a result, Rett Syndrome is thought to be caused by  
463 experience-dependent loss of neuronal function, which would correlate with data  
464 suggesting that MECP2 regulates activity dependent gene expression<sup>10,13,37</sup>. The  
465 microcephaly has been proposed to be a function of decreased nuclear size and

466 dendritic arborization of affected neurons<sup>13,22</sup>. Could the telomere shortening induced  
467 senescence described here underlie patient phenotypes? Several studies have looked  
468 at the effects of telomere shortening specifically in the neural lineage and found  
469 consistently that shortened telomeres leads to upregulation of p53 and decreased  
470 dendritic arborization<sup>64,66,81</sup>, a phenotype widely described to afflict MECP2 null neurons  
471 *in vitro* and *in vivo* (Fig 1).

472

473 These results presented here raise the question of whether telomere defects could be  
474 common to the etiologies of other ID syndromes. The phenotypes described here show  
475 a striking similarity to those observed in hiPSCs and neural derivatives made from  
476 patients with Immunodeficiency, centromeric region instability, facial anomalies  
477 syndrome (ICF) Syndrome<sup>82-84</sup>. Two independent studies showed that ICF patient-  
478 derived hiPSCs displayed subtelomeric hypomethylation, induction of subtelomeric  
479 gene expression, TERRA induction and telomere shortening that was coupled to  
480 senescence of somatic derivatives such as fibroblasts. ICF Syndrome only partially  
481 overlaps with Rett Syndrome in terms of patient phenotypes, but is caused by mutations  
482 in DNMT3B, a *de novo* DNA methyltransferase<sup>85</sup>. These findings together are highly  
483 relevant as DNMT3B is a key *de novo* methyl transferase to create methylated DNA  
484 (5mC), which is the substrate for Tet oxigenases to create 5-hydroxymethylated DNA  
485 (5hmC). Recently, another study showed that deletion of Tet enzymes, which are  
486 critical to generate the 5hmC mark, led to shortened telomeres<sup>56,86</sup>. Together, these  
487 studies demonstrate that DNA hydroxymethylation is important in the regulation of

488 telomere length, and our data suggest that MECP2 is potentially an important mediator  
489 of this effect.

490

491 ATRX-related syndrome shares many phenotypic features with Rett Syndrome (ID,  
492 seizures, and microcephaly), and the causative gene, ATRX, is known associate with  
493 MECP2 both genetically as well as biochemically<sup>87-92</sup>. In murine models of loss of  
494 ATRX, telomere shortening and reduced lifespan are observed<sup>93</sup>. The fact that the  
495 causative mutations of ICF, Rett and ATRX syndromes are in genes whose products  
496 are thought to interact in the regulation of DNA methylation and all possess telomeric  
497 defects suggests that the similarities of patient phenotypes could be the result of  
498 neuronal response to telomere shortening. This molecular overlap could even form the  
499 basis of novel therapeutic strategies that either reverse telomere shortening or block the  
500 response of the cell to telomere defects with agents such as Pifithrin, as shown in Fig  
501 6F.

502

503 Considering the phenotypes of ICF derived cells, and those of Tet-deleted cells, it  
504 seems reasonable to suggest that telomere deficiency could be related to intellectual  
505 disability. In addition, subtelomeric and telomeric dysfunction has been implicated in up  
506 to 10% of all intellectual disability syndromes<sup>94-96</sup>. Another ID syndrome, Hoyeraal-  
507 Hreidarsson, is caused by mutations in RTEL1 (regulator of telomere elongation  
508 helicase 1), a factor that interacts with shelterin complex and is critical for telomere  
509 elongation<sup>94</sup>. These patients are characterized by low birth weight, microcephaly and

510 immunological dysfunction. Therefore, mutations that specifically result in telomere  
511 shortening lead to disease phenotypes similar to those found in patients with loss of  
512 MECP2. As a result, we cannot exclude the possibility that telomere shortening during  
513 *in utero* development generates neurons that are less well equipped to deal with post-  
514 natal stimulation. Furthermore, our analysis of the single male Rett brain specimen  
515 available to us suggested that brains completely lacking MECP2 also had shorter  
516 telomeres.

517

518 Another possible interpretation of these data is that instead of a failure to mature, Rett  
519 Syndrome neurons instead show aspects of premature aging. The fact that MECP2 null  
520 neurons have shorter telomeres (Fig 5), show induction of aging related genes including  
521 p53 (Fig 3 and 6), and show senescence (Fig 6) are all consistent with this idea<sup>97</sup>. In  
522 addition, the fact that WT-NPCs and neurons transduced with the Progerin allele<sup>98</sup>,  
523 which is known to cause premature aging, show similar phenotypes as neurons lacking  
524 MECP2 is also consistent with this idea. On the other hand, while Rett patients suffer  
525 from a post-natal cognitive decline, and long term survivors show phenotypes  
526 associated with Parkinson's disease<sup>99</sup>, the typical phenotypes presented in young  
527 female patients are not consistent with premature aging. Whether the physiological  
528 response to loss of MECP2 is truly akin to premature aging or whether patients suffer  
529 from the effects telomere dysfunction that is unrelated to aging is worthy of continued  
530 investigation.

531



532 Regardless, it is tempting to speculate that treatments that could relieve telomere  
533 dysfunction or abrogate the p53 mediated stress response could potentially ameliorate  
534 patient outcomes. Pifithrin- $\alpha$  has already been shown to be an effective treatment to  
535 restore neuronal function in murine models of injury or stroke<sup>100-102</sup>. Significant future  
536 effort will be devoted to determining both whether telomere dysfunction is a common  
537 trigger for ID Syndromes, and whether telomere restoration could potentially help  
538 patients.

539

#### 540 **Acknowledgements**

541 We are grateful to Lorenz Studer for sharing the Progerin-GFP and Nuclear-GFP  
542 constructs. Human tissue was obtained from the NIH Neurobiobank at the University of  
543 Maryland (Baltimore, MD). AZX and TPW are partially supported by Connecticut  
544 Regenerative Medicine Foundation (13-SCB-YALE-12). This work was funded by  
545 training grants to MO (NIH-Virology and Gene Therapy, UCLA), PL (CIRM, UCLA), CS  
546 (CIRM-Bridges, Cal-State-Northridge), DA (HHURP, UCLA). PJ was supported by  
547 grants from NIH (KP was supported by NS051630, NS079625 and MH102690). AZX  
548 and TPW were supported by the Connecticut Regenerative Medicine Foundation (13-  
549 SCB-YALE-12). WEL was supported by a Rose Hills Scholar award through the Eli and  
550 Edythe Broad Center for Regenerative Medicine. WEL and KP were supported by NIH  
551 (P015P01GM099134). This research was also supported by the Allen Distinguished  
552 Investigator Program, through The Paul G. Allen Frontiers Group.

553

## 554 **Materials and Methods**

### 555 *Generation of isogenic Rett Syndrome iPSCs*

556 Two primary fibroblast lines GM17567 (1461A>G in the gene encoding methyl-CpG  
557 binding protein 2 (MECP2)), and GM07982 (frameshift mutation, 705delG, in the gene  
558 encoding methyl-CpG binding protein 2 (MECP2)), from patients with Rett Syndrome  
559 were obtained from Coriell Cell Repositories.  $1 \times 10^5$  fibroblasts were plated in a gelatin  
560 coated well of a 6 well plate in MEF media (DMEM/F12 + 10% FBS). After 8-12 hours,  
561 the cells were infected with reprogramming lentivirus that harbors polycistronic human  
562 Yamanaka factors (Oct4, Klf4, Sox2, cMyc) in DMEM medium containing 10ug/ml of  
563 polybrene and incubated overnight at 37°C in 5% CO<sub>2</sub> incubator. The following day, the  
564 viral media was aspirated, replaced with MEF media and cultured for 3 additional days.  
565 Cells were re-plated on the 5th day onto irradiated MEFs in MEF media. On day 6, the  
566 culturing media was changed to human ES media containing DMEM/F12 supplemented  
567 with L-glutamine, nonessential amino acids (NEAA), penicillin-streptomycin, knockout  
568 serum replacement (Invitrogen), and 10 ng/ml basic FGF. Cells were cultured in hiPSC  
569 media until iPSC-like colonies were formed. Reprogrammed colonies were further  
570 identified by live immunofluorescence staining with TRA-1-81 (Chemicon) then  
571 mechanically isolated. Individual colonies were isolated and maintained for at least 2  
572 passages before genotyping analysis. For early passages, the iPSCs were propagated  
573 mechanically, whereas collagenase was used for subsequent passaging. hiPSCs were  
574 cultured as described previously in accordance with the UCLA ESCRO.

575

576 *Generation of teratomas*

577 Generation of teratoma was previously described<sup>103</sup>. Briefly, a single incision was made  
578 in the peritoneal cavity of adult SCID mice and the testis was explanted through the  
579 incision site. Approximately 60,000 iPSC in a volume of 50 µl 0.5X Matrigel (BD) were  
580 transplanted into the testis using a 27-gauge needle. Four to six weeks after surgery,  
581 mice were euthanized and the tumors removed for histology. Surgery was performed  
582 following Institutional Approval for Appropriate Care and use of Laboratory animals by  
583 the UCLA Institutional Animal Care and Use Committee (Chancellor's Animal Research  
584 Committee (ARC)).

585

586 *Differentiation in vitro and analysis*

587 Neural specification with neural rosette derivation, neuroprogenitor (NPC) purification,  
588 and further differentiation to neurons and glia were performed as described previously  
589 <sup>34,104,105</sup>. Relative neuralization efficiency was analyzed by counting the number of  
590 neural rosette containing colonies over total number of iPSC colonies. 6-12 35 mm  
591 wells were analyzed over four separate experiments. The proliferation efficiency of  
592 NPCs was determined by at days 1, 3, and 5 by the total number of cells present in  
593 35mm wells seeded at 200,000 cells on day 0. The cells were detached from the plates  
594 using accutase (Millipore) then total number of cells per well analyzed using Z1 Coulter  
595 particle counter (Beckman Coulter).

596

597 For spontaneous terminal neuronal differentiation by growth factor withdrawal, NPC  
598 cultures were subjected to growth factor withdrawal (removal of EGF and FGF) and  
599 cultured in basic medium (DMEMF12 + N2 + B27) with three quarter exchange of media  
600 every three days. Cells were cultured up to 20 weeks. Neural differentiation efficiency  
601 was analyzed four weeks after growth factor withdrawal by counting the number of cells  
602 positive for neuronal markers (MAP2 and Tuj1) over the total number of cells visualized  
603 by DAPI. NPCs were transfected with DCX-GFP reporter one day prior to differentiation  
604 using Lipofectamine 2000 (Invitrogen). Sholl analysis of DCX-GFP positive neuronal  
605 neuritis were also measured using ImageJ. All data values were presented as mean +/-  
606 SEM. Student's t-tests were applied to data with two groups. ANOVA analyses were  
607 used for comparisons of data with greater than two groups.

608

609 For directed differentiation of interneurons, iPSCs were grown on plates coated with  
610 matrigel (Corning) until 80% confluency with mTeSR (Stem Cell Technologies). Cells  
611 were then treated with DMEM/F12 (GIBCO) containing NEAA (GIBCO), GlutaMAX  
612 (GIBCO), bovine serum albumin (Sigma-Aldrich),  $\beta$ -mercaptoethanol (Sigma-Aldrich),  
613 N2 (GIBCO), B27 (GIBCO), SB431542 (10 $\mu$ M; Cayman Chemical), LDN-193189  
614 (100nM; Cayman Chemical) and XAV939 (2 $\mu$ M; Cayman Chemical) later transitioning to  
615 the media containing sonic hedgehog (20ng/mL; R&D) and purmorphamine (1 $\mu$ M;  
616 Cayman Chemical) as previously described (Maroof et al., 2013). Cells were further  
617 differentiated into interneurons with neurobasal medium (GIBCO) containing N2  
618 (GIBCO), B27 (GIBCO), ascorbic acid (Sigma-Aldrich), GlutaMAX (GIBCO), bovine  
619 serum albumin (Sigma-Aldrich),  $\beta$ -mercaptoethanol (Sigma-Aldrich), neurotrophin-3

620 (10ng/mL; R&D), brain-derived neurotrophic factor (10ng/mL; R&D), and glial cell-  
621 derived neurotrophic factor (10ng/mL; R&D).

622

### 623 *Neuronal activation*

624 8 weeks *in vitro* differentiated neuronal culture were subjected depolarizing stimulation  
625 with 55mM of KCl in basic media for 0hr, 1hr, 5hr and 7hr then isolated for RNA  
626 analysis and coverslips fixed with 4% paraformaldehyde for immunostaining.

627

### 628 *Western blot*

629 Cells were lysed on ice with RIPA buffer (Pierce) that contains Halt Protease Inhibitor  
630 Cocktail (Thermo Fisher Scientific) and Halt Phosphatase Inhibitor Cocktail (Thermo  
631 Fisher Scientific). The total protein concentration was measured using BCA Protein  
632 Assay Kit (Thermo Fisher Scientific) following the manufacturer's protocol. The lysates  
633 containing the equal amount of total protein were mixed with NuPAGE sample buffer  
634 (Invitrogen) with 5% mercaptoethanol and denatured at 95 °C for 10 min. Supernatant  
635 was electrophoresed onto NuPAGE 4-12% Bis-Tris Protein Gels (Invitrogen) using  
636 MOPS running buffer (Invitrogen). Gels were then electroblotted using semi-dry  
637 transfer apparatus onto a membrane. The membrane was blocked with 5% non-fat milk  
638 for 1 hr and incubated overnight with primary antibodies at 4°C. The next day the  
639 membrane was washed and incubated with HRP-conjugated secondary antibodies for 1  
640 hr at room temperature. The membrane was then incubated with ECL Western Blotting

641 Substrate and developed.

642

643 *Immunofluorescence and image quantification*

644 Cells on coverslips were washed with PBS, fixed in 4% paraformaldehyde for 15 min at  
645 room temperature, blocked for 1 hr at room temperature with 10% serum and 0.1%  
646 Triton-X-100, then incubated overnight at 4 °C with primary antibodies. Frozen tissue  
647 sections were thawed to room temperature, fixed in 4% paraformaldehyde for 15 min at  
648 room temperature, permeabilized with 0.2% Triton-X-100 for 15 min at room  
649 temperature and blocked with 10% serum at 4 °C overnight, followed by incubation with  
650 primary antibodies at 4 °C for 16-24 hr. Following primary antibody incubation, the  
651 coverslips were incubated with Alexa Fluor (Invitrogen) or Jackson immunoresearch  
652 secondary antibodies at room temperature for 1 hr. Cells were counterstained with  
653 DAPI and mounted in Prolong Gold (ThermoFisher). Antibodies used include the  
654 following: mouse anti-OCT3/4 (1:100, Santa Cruz Biotechnology Inc.), rabbit anti-SOX2  
655 (1:300, Cell Signaling Technology), rabbit anti-Nanog (1:100, Cell Signaling  
656 Technology), mouse anti-Tra-1-81 (1:250, Chemicon), mouse anti-NESTIN (1:1000,  
657 Neuromics), chicken anti-MAP2 (1:2000, Biolegend), chicken anti-GFAP (1:2000,  
658 Abcam), rabbit anti-Tubulin  $\beta$ 3 (1:500, Covance), mouse anti-p53 (1:500, Cell  
659 Signaling), rabbit anti-p21 (1:250, Santa Cruz), mouse anti-PML (1:100, Santa Cruz),  
660 mouse anti-phospho-Histone H2A.X (1:2000, EMD Millipore), rabbit anti-5hmc (1:100,  
661 Active Motif), rabbit anti MECP2 (1:1000, Diagenode), rabbit anti Foxg1 (1:1000,  
662 Abcam), and mouse anti NKX2.1 (1:300, Novocastra). Secondary antibodies

663 conjugated with Alexa 488, 568, 594, 647 (1:500, Life Technologies) were used.  
664 Imaging was performed on Zeiss Axio Imager A1 or Zeiss LSM780 confocal microscope  
665 using a 40X or 63X objective on randomly selected cells. Mean intensity or a number of  
666 foci were quantified using ImageJ (<http://rsb.info.nih.gov/ij/>). At least 100 cells per  
667 condition were used for each independent experiment.

668

### 669 *RT-qPCR*

670 RNA from cultured cells was collected using the RNeasy Mini Kit from Qiagen according  
671 to the manufacturer's instructions. The concentration and purity of RNA were measured  
672 using nanodrop spectrophotometers (Thermo Scientific). RNA with an A260/A280 ratio  
673 in between 1.8 and 2.0 as well as an A260/A230 ratio in between 2.0 and 2.2 was used.  
674 RNA was then reverse transcribed using the Super Script III First-Strand cDNA  
675 Synthesis kit with Random Hexamers (Invitrogen) according to the manufacturer's  
676 instructions. Quantitative PCR was performed using SYBR Green master mix (Roche).  
677 Primers were used at a final concentration of 1  $\mu$ M. Reactions were performed in  
678 duplicate and duplicate CT values were averaged and then used for standard  $\Delta\Delta$ CT  
679 analysis. Expression levels were normalized to beta actin. See Supplementary Table 2  
680 for qPCR primer sequences.

681

### 682 *Data collection and statistical analysis*

683 All the experimental data (RT-qPCR, qPCR assay for telomere length, immunostaining,  
684  $\beta$ -Galactosidase Senescence Assay) were presented as mean +/- SEM based on at  
685 least three biological replicates from independent experiments using the cell lines  
686 indicated in Supplementary Table 1. Student's t tests were applied to data with two  
687 groups. ANOVA analyses were used for comparisons of data with greater than two  
688 groups. A p value < 0.05 was considered as statistically significant.

689

#### 690 *siRNA gene silencing*

691 All knockdown experiments were performed using trilencer siRNAs (from OriGene  
692 Technologies) and RNAimax (ThermoFisher) in Opti-MEM media (ThermoFisher).  
693 Trilencers were used at a concentration of 20 nM. Transfection media was prepared  
694 and then 500,000 cells were plated on top of the transfection media in 6-well plates. The  
695 medium was changed to normal NPC media the next day and cells were collected for  
696 analysis at the time points indicated.

697

#### 698 *$\beta$ -Galactosidase Senescence Assay*

699  $\beta$ -Galactosidase Senescence Assay was performed using the Senescence  $\beta$ -  
700 Galactosidase Staining Kit from Cell Signaling according to manufacturer's instructions.  
701 Briefly, the cells were fixed on coverslips, incubated with X-gal overnight at 37°C, then  
702 mounted on glass slides and imaged using a brightfield microscope. The number of  
703 blue cells and number of total cells were quantified using the Cell Counter plugin in



704 ImageJ.

705

706 *Quantitative fluorescence in situ hybridization*

707 Cells were fixed with 4% paraformaldehyde for 15 min at RT and permeabilized with  
708 0.5% Triton X for 10 min at RT. After dehydration series of 80, 95, and 100% cold  
709 ethanol, cells were then treated with RNase (100ug/mL in 2xSSC) for 30 min at 37°C.  
710 After washing and another dehydration series, cells were denatured at 85°C for 15 min  
711 in the hybridization mix (70% DI formamide, 10 mM Tris-HCl, pH 7.5, 2xSSC, 0.1ug/mL  
712 salmon sperm DNA) containing PNA probes (TelC-FITC and Cent-Cy3, Panagene) at  
713 1ug/mL and then incubated for 2 hr at RT in dark. After hybridization, cells were washed  
714 3X for 5 min in 2xSSC/50% DI formamide, in 2xSSX with 0.1 Tween20, and in 1xSSC.  
715 Cells were then counterstained with DAPI and mounted with ProLong Gold  
716 (ThermoFisher).

717

718 *Southern blot analysis of terminal restriction fragments (TRF)*

719 Total genomic DNA was extracted using DNeasy Blood and Tissue Kit (Qiagen)  
720 following the manufacturer's instruction. Fresh genomic DNA with high purity (an  
721 A260/A280 ratio of 1.8) was used for experiments. The integrity of genomic DNA was  
722 determined by gel electrophoresis. Southern blotting was carried using a TeloTTAGGG  
723 assay kit (Roche Applied Sciences) following the manufacturer's protocol with some  
724 modifications (Kimura et al., 2010).

725

726 *Quantitative PCR assay for average telomere length measurement*

727 Total genomic DNA was extracted using DNeasy Blood and Tissue Kit (Qiagen)  
728 following the manufacturer's instruction. The concentration and purity of genomic DNA  
729 were measured using nanodrop spectrophotometers (Thermo Scientific). Fresh  
730 genomic DNA with high purity (an A260/A280 ratio of 1.8) was used for experiments.  
731 The integrity of genomic DNA was determined by gel electrophoresis. QPCR was  
732 performed as previously described (Cawthon, 2002) with further modifications (Jodczyk  
733 et al., 2015). Briefly, two qPCR reactions were carried using either primers for single  
734 copy reference gene (albumin) or telomeres at a final concentration of 900nM (See  
735 Supplementary Table 2 for primer sequences). In each reaction, a standard curve was  
736 made by serially diluting one reference DNA by 2 fold ranging from 1.56 ng to 50 ng in  
737 order to ensure the PCR efficiency of 90-100% with the linear correlation coefficient  
738 greater than 0.98 for each independent experiment. 5ng of sample genomic DNA was  
739 added in a 384 well plate with a total reaction volume of 15uL. Each reaction was  
740 performed in duplicate and duplicate CT values were averaged and then used to  
741 calculate for relative telomere copy number to single gene copy number (T/S) ratio.

742

743 *Quantification of Dendritic Arborization*

744 Neuronal cultures were immunostained for Tuj1 in order to identify mature neurons and  
745 visualize entire cells. The stained cells were then imaged at 20x and dendritic arbors of  
746 individual cells were traced using the Simple Neurite Tracer plugin for ImageJ. The

747 number of process ends per cell were counted using the Cell Counter plugin for ImageJ.  
748 Only mature neurons—identifiable by their thin processes and condensed somas—were  
749 used for analysis. The number of process ends per cell are presented as mean ends  
750 per cell +/- SEM. Means were compared using the Student's T-Test for data with two  
751 groups. A p value <0.05 was used as the cutoff for significance.

752

### 753 *RNA expression profiling*

754 RNA purification was performed with Qiagen RNAeasy kit following the manufacturer's  
755 instruction. Libraries were prepared according to the manufacturers guidelines using  
756 The TruSeq V2 kit (Illumina). Microarray profiling was performed with Affymetrix Human  
757 HG-U133 2.0 Plus arrays as described<sup>106</sup>. For RNA sequencing, the datasets were  
758 mapped with RASER and HISAT2. The reads were counted per gene. Genes were  
759 defined by the exon union from the hg19 ensembl annotations. The function of DESeq  
760 in DESeq2 package was used to first normalize the gene read counts data and then  
761 identified the differentially expressed genes. The MA plot was generated with the  
762 function of plotMA in DESeq2 package. Q-value of 0.05 is regarded as the stringent  
763 cutoff of calling DEGs while p-value less than 0.05 is regarded as the low stringency  
764 cutoff. For the meta-chromosome plot of DEGs, all the chromosomes (except  
765 chromosome Y) were first divided equally into 20bins with different length, and then the  
766 number of DEGs in each bin was counted. GO analysis was performed using DAVID.

767

### 768 *Analysis of 5hydroxymethyl-cytosine*

769 *5hmC capture (hmC-Seal)*

770 Chemical labeling-based 5hmC enrichment was described previously<sup>107</sup>. In brief, five  
771 microgram of genomic DNA was sonicated to 100-500 bp, and then mixed with 100  $\mu$ l  
772 reaction buffer (50 mM HEPES at pH 8.0, 25 mM MgCl<sub>2</sub>, 250  $\mu$ M UDP-6-N<sub>3</sub>-Glu and  
773 2.25  $\mu$ M wild-type  $\beta$ -glucosyltransferase ( $\beta$ -GT)). Reactions were incubated at 37°C for  
774 1 hour, and DNA substrates were purified by Qiagen DNA purification kit. 150  $\mu$ M  
775 dibenzocyclooctyne modified biotin were mixed with  $\beta$ -GT-modified DNA. The labeling  
776 reaction was performed at 37°C for 2 hours. The biotin-labeled DNA was then enriched  
777 by Streptavidin-coupled Dynabeads (Dynabeads MyOne™ Streptavidin T1, Life  
778 Technologies) and purified by Qiagen DNA purification kit. The quantity and quality of  
779 purified DNA were analyzed by Qubit 3.0 Fluorometer (Invitrogen) and Agilent 2100  
780 BioAnalyzer using DNA high sensitivity analysis kits (Agilent Technologies).

781

782 *MeDIP-seq*

783 Methylated DNA Immunoprecipitation (MeDIP) experiments were performed according  
784 to the manufacturer's protocol (Active Motif) and described previously<sup>108</sup>. In brief, five  
785 microgram of genomic DNA were sonicated to 100-500 bp, and incubated with 5mC-  
786 specific antibody (Active Motif) at 4°C overnight. Enriched methylated DNA will be  
787 extensively washed and purified by Qiagen DNA purification kit. The quantity and quality  
788 of purified DNA were analyzed by Qubit 3.0 Fluorometer (Invitrogen) and Agilent  
789 Bioanalyzer using DNA high sensitivity analysis kits (Agilent Technologies).

790

791 *Library Preparation and High-throughput Sequencing*

792 Enriched DNA from MeDIP and hME-Seal was subjected to library construction using  
793 the NEBNext ChIP-Seq Library Prep Reagent Set for Illumina according the  
794 manufacturer's protocol. In brief, 25 ng of input genomic DNA or experimental enriched  
795 DNA were utilized for each library construction. 150-300 bp DNA fragments were  
796 selected by AMPure XP Beads (Beckman Coulter) after the adapter ligation. An Agilent  
797 2100 BioAnalyzer were used to quantify the amplified DNA, qPCR were applied to  
798 accurately quantify the library concentration. 20 pM diluted libraries were used for  
799 sequencing. 50-cycle single-end sequencing reactions were performed. Image  
800 processing and sequence extraction were done using the standard Illumina Pipeline.

801

## 802 *Analysis*

803 Bowtie software was used to map the sequenced reads back to the human genome  
804 (hg19) with the parameter of allowing up to two mismatches. Only the uniquely mapped  
805 reads were then used to generate the piled-up genome coverage of methylation signals.  
806 The methylation signals were further normalized by per million mapped reads for  
807 following analysis. The human genome was then segmented into bins of 1kilo-base  
808 pairs, which allows for the identification of bins which shows most dramatic methylation  
809 signals differences between wild-type and mutant samples. The delta methylation signal  
810 of 0.2 per million reads was chosen as the cutoff of calling the Differential Methylation  
811 Regions. For the meta-chromosome plot, all the chromosomes (except chromosome Y)  
812 were divided equally into 20 bins with different length. We then summarized the total  
813 methylation signal within each bin and subtracted the signal between wild-type samples

814 and mutant samples. The subtracted signal was then plotted as the meta-chromosomal  
815 plot of methylation differences.

816

## 817 **References**

- 818 1 Meehan, R. R., Lewis, J. D. & Bird, A. P. Characterization of MeCP2, a vertebrate DNA binding  
819 protein with affinity for methylated DNA. *Nucleic Acids Res* **20**, 5085-5092 (1992).
- 820 2 Lewis, J. D. *et al.* Purification, sequence, and cellular localization of a novel chromosomal protein  
821 that binds to methylated DNA. *Cell* **69**, 905-914 (1992).
- 822 3 Chen, R. Z., Akbarian, S., Tudor, M. & Jaenisch, R. Deficiency of methyl-CpG binding protein-2 in  
823 CNS neurons results in a Rett-like phenotype in mice. *Nat Genet* **27**, 327-331, doi:10.1038/85906  
824 (2001).
- 825 4 Bird, A. The methyl-CpG-binding protein MeCP2 and neurological disease. *Biochem Soc Trans* **36**,  
826 575-583, doi:10.1042/BST0360575 (2008).
- 827 5 Chahrouh, M. & Zoghbi, H. Y. The story of Rett syndrome: from clinic to neurobiology. *Neuron*  
828 **56**, 422-437, doi:10.1016/j.neuron.2007.10.001 (2007).
- 829 6 Tomassy, G. S., Morello, N., Calcagno, E. & Giustetto, M. Developmental abnormalities of  
830 cortical interneurons precede symptoms onset in a mouse model of Rett syndrome. *Journal of*  
831 *neurochemistry* **131**, 115-127, doi:10.1111/jnc.12803 (2014).
- 832 7 Kao, F. C., Su, S. H., Carlson, G. C. & Liao, W. MeCP2-mediated alterations of striatal features  
833 accompany psychomotor deficits in a mouse model of Rett syndrome. *Brain Struct Funct* **220**,  
834 419-434, doi:10.1007/s00429-013-0664-x (2015).
- 835 8 Goffin, D., Brodtkin, E. S., Blendy, J. A., Siegel, S. J. & Zhou, Z. Cellular origins of auditory event-  
836 related potential deficits in Rett syndrome. *Nat Neurosci* **17**, 804-806, doi:10.1038/nn.3710  
837 (2014).
- 838 9 Kang, S. K., Kim, S. T., Johnston, M. V. & Kadam, S. D. Temporal- and Location-Specific  
839 Alterations of the GABA Recycling System in Mecp2 KO Mouse Brains. *J Cent Nerv Syst Dis* **6**, 21-  
840 28, doi:10.4137/JCNSD.S14012 (2014).
- 841 10 Lee, W. *et al.* MeCP2 regulates activity-dependent transcriptional responses in olfactory sensory  
842 neurons. *Hum Mol Genet* **23**, 6366-6374, doi:10.1093/hmg/ddu358 (2014).
- 843 11 Chen, W. G. *et al.* Derepression of BDNF transcription involves calcium-dependent  
844 phosphorylation of MeCP2. *Science* **302**, 885-889, doi:10.1126/science.1086446 (2003).
- 845 12 Tudor, M., Akbarian, S., Chen, R. Z. & Jaenisch, R. Transcriptional profiling of a mouse model for  
846 Rett syndrome reveals subtle transcriptional changes in the brain. *Proc Natl Acad Sci U S A* **99**,  
847 15536-15541, doi:10.1073/pnas.242566899 (2002).
- 848 13 Zhou, Z. *et al.* Brain-specific phosphorylation of MeCP2 regulates activity-dependent Bdnf  
849 transcription, dendritic growth, and spine maturation. *Neuron* **52**, 255-269,  
850 doi:10.1016/j.neuron.2006.09.037 (2006).
- 851 14 Li, Y. *et al.* Global transcriptional and translational repression in human-embryonic-stem-cell-  
852 derived Rett syndrome neurons. *Cell Stem Cell* **13**, 446-458, doi:10.1016/j.stem.2013.09.001  
853 (2013).
- 854 15 Yakabe, S. *et al.* MeCP2 knockdown reveals DNA methylation-independent gene repression of  
855 target genes in living cells and a bias in the cellular location of target gene products. *Genes*  
856 *Genet Syst* **83**, 199-208 (2008).

- 857 16 Mellen, M., Ayata, P., Dewell, S., Kriaucionis, S. & Heintz, N. MeCP2 binds to 5hmC enriched  
858 within active genes and accessible chromatin in the nervous system. *Cell* **151**, 1417-1430,  
859 doi:10.1016/j.cell.2012.11.022 (2012).
- 860 17 Nan, X. *et al.* Transcriptional repression by the methyl-CpG-binding protein MeCP2 involves a  
861 histone deacetylase complex. *Nature* **393**, 386-389, doi:10.1038/30764 (1998).
- 862 18 Nan, X., Cross, S. & Bird, A. Gene silencing by methyl-CpG-binding proteins. *Novartis Found Symp*  
863 **214**, 6-16; discussion 16-21, 46-50 (1998).
- 864 19 Cross, S. H., Meehan, R. R., Nan, X. & Bird, A. A component of the transcriptional repressor  
865 MeCP1 shares a motif with DNA methyltransferase and HRX proteins. *Nat Genet* **16**, 256-259,  
866 doi:10.1038/ng0797-256 (1997).
- 867 20 Nan, X., Campoy, F. J. & Bird, A. MeCP2 is a transcriptional repressor with abundant binding sites  
868 in genomic chromatin. *Cell* **88**, 471-481 (1997).
- 869 21 Marchetto, M. C. *et al.* A model for neural development and treatment of Rett syndrome using  
870 human induced pluripotent stem cells. *Cell* **143**, 527-539, doi:S0092-8674(10)01186-4 [pii]  
871 10.1016/j.cell.2010.10.016 (2010).
- 872 22 Smrt, R. D. *et al.* Mecp2 deficiency leads to delayed maturation and altered gene expression in  
873 hippocampal neurons. *Neurobiol Dis* **27**, 77-89, doi:10.1016/j.nbd.2007.04.005 (2007).
- 874 23 Luikenhuis, S., Giacometti, E., Beard, C. F. & Jaenisch, R. Expression of MeCP2 in postmitotic  
875 neurons rescues Rett syndrome in mice. *Proc Natl Acad Sci U S A* **101**, 6033-6038,  
876 doi:10.1073/pnas.0401626101 (2004).
- 877 24 Farra, N. *et al.* Rett syndrome induced pluripotent stem cell-derived neurons reveal novel  
878 neurophysiological alterations. *Mol Psychiatry* **17**, 1261-1271, doi:10.1038/mp.2011.180 (2012).
- 879 25 Tchieu, J. *et al.* Female human iPS cells retain an inactive X-chromosome. *Cell Stem Cell* **October**  
880 (2010).
- 881 26 Winkler, T. *et al.* No evidence for clonal selection due to lentiviral integration sites in human  
882 induced pluripotent stem cells. *Stem Cells* **28**, 687-694, doi:10.1002/stem.322 (2010).
- 883 27 Sahakyan, A. *et al.* Human Naive Pluripotent Stem Cells Model X Chromosome Dampening and X  
884 Inactivation. *Cell Stem Cell*, doi:10.1016/j.stem.2016.10.006 (2016).
- 885 28 Pasque, V. *et al.* X chromosome reactivation dynamics reveal stages of reprogramming to  
886 pluripotency. *Cell* **159**, 1681-1697, doi:10.1016/j.cell.2014.11.040 (2014).
- 887 29 Maherali, N. *et al.* Directly reprogrammed fibroblasts show global epigenetic remodeling and  
888 widespread tissue contribution. *Cell Stem Cell* **1**, 55-70 (2007).
- 889 30 Dajani, R., Koo, S. E., Sullivan, G. J. & Park, I. H. Investigation of Rett syndrome using pluripotent  
890 stem cells. *J Cell Biochem* **114**, 2446-2453, doi:10.1002/jcb.24597 (2013).
- 891 31 Cheung, A. Y. *et al.* Isolation of MECP2-null Rett Syndrome patient hiPS cells and isogenic  
892 controls through X-chromosome inactivation. *Hum Mol Genet* **20**, 2103-2115,  
893 doi:10.1093/hmg/ddr093 (2011).
- 894 32 Hotta, A. *et al.* Isolation of human iPS cells using EOS lentiviral vectors to select for pluripotency.  
895 *Nat Methods* **6**, 370-376 (2009).
- 896 33 Mekhoubad, S. *et al.* Erosion of Dosage Compensation Impacts Human iPSC Disease Modeling.  
897 *Cell stem cell* **10**, 595-609, doi:10.1016/j.stem.2012.02.014 (2012).
- 898 34 Patterson, M. *et al.* Defining the nature of human pluripotent stem cell progeny. *Cell research*,  
899 doi:10.1038/cr.2011.133 (2011).
- 900 35 Patterson, M. *et al.* Defining the nature of human pluripotent stem cell progeny. *Cell Res* **22**,  
901 178-193, doi:10.1038/cr.2011.133 (2012).
- 902 36 Benito, E. & Barco, A. The neuronal activity-driven transcriptome. *Mol Neurobiol* **51**, 1071-1088,  
903 doi:10.1007/s12035-014-8772-z (2015).

- 904 37 Degano, A. L., Park, M. J., Penati, J., Li, Q. & Ronnett, G. V. MeCP2 is required for activity-  
905 dependent refinement of olfactory circuits. *Mol Cell Neurosci* **59**, 63-75,  
906 doi:10.1016/j.mcn.2014.01.005 (2014).
- 907 38 Cohen, S. *et al.* Genome-wide activity-dependent MeCP2 phosphorylation regulates nervous  
908 system development and function. *Neuron* **72**, 72-85, doi:10.1016/j.neuron.2011.08.022 (2011).
- 909 39 Singleton, M. K. *et al.* MeCP2 is required for global heterochromatic and nucleolar changes  
910 during activity-dependent neuronal maturation. *Neurobiol Dis* **43**, 190-200,  
911 doi:10.1016/j.nbd.2011.03.011 (2011).
- 912 40 Tao, J. *et al.* Phosphorylation of MeCP2 at Serine 80 regulates its chromatin association and  
913 neurological function. *Proc Natl Acad Sci U S A* **106**, 4882-4887, doi:10.1073/pnas.0811648106  
914 (2009).
- 915 41 Chapman, V. L., Terranova, R., Moggs, J. G., Kimber, I. & Dearman, R. J. Evaluation of 5-  
916 methylcytosine and 5-hydroxymethylcytosine as potential biomarkers for characterisation of  
917 chemical allergens. *Toxicology* **340**, 17-26, doi:10.1016/j.tox.2015.12.003 (2016).
- 918 42 Zhu, L. *et al.* Genome-Wide Mapping of 5mC and 5hmC Identified Differentially Modified  
919 Genomic Regions in Late-Onset Severe Preeclampsia: A Pilot Study. *PLoS One* **10**, e0134119,  
920 doi:10.1371/journal.pone.0134119 (2015).
- 921 43 Zhao, M. T., Whyte, J. J., Hopkins, G. M., Kirk, M. D. & Prather, R. S. Methylated DNA  
922 immunoprecipitation and high-throughput sequencing (MeDIP-seq) using low amounts of  
923 genomic DNA. *Cell Reprogram* **16**, 175-184, doi:10.1089/cell.2014.0002 (2014).
- 924 44 Jin, S. G., Kadam, S. & Pfeifer, G. P. Examination of the specificity of DNA methylation profiling  
925 techniques towards 5-methylcytosine and 5-hydroxymethylcytosine. *Nucleic Acids Res* **38**, e125,  
926 doi:10.1093/nar/gkq223 (2010).
- 927 45 Maroof, A. M. *et al.* Directed differentiation and functional maturation of cortical interneurons  
928 from human embryonic stem cells. *Cell Stem Cell* **12**, 559-572, doi:10.1016/j.stem.2013.04.008  
929 (2013).
- 930 46 Krishnan, K. *et al.* MeCP2 regulates the timing of critical period plasticity that shapes functional  
931 connectivity in primary visual cortex. *Proc Natl Acad Sci U S A* **112**, E4782-4791,  
932 doi:10.1073/pnas.1506499112 (2015).
- 933 47 Ito-Ishida, A., Ure, K., Chen, H., Swann, J. W. & Zoghbi, H. Y. Loss of MeCP2 in Parvalbumin-and  
934 Somatostatin-Expressing Neurons in Mice Leads to Distinct Rett Syndrome-like Phenotypes.  
935 *Neuron* **88**, 651-658, doi:10.1016/j.neuron.2015.10.029 (2015).
- 936 48 Lopez de Silanes, I. *et al.* Identification of TERRA locus unveils a telomere protection role  
937 through association to nearly all chromosomes. *Nat Commun* **5**, 4723,  
938 doi:10.1038/ncomms5723 (2014).
- 939 49 Thijssen, P. E. *et al.* Chromatin remodeling of human subtelomeres and TERRA promoters upon  
940 cellular senescence: commonalities and differences between chromosomes. *Epigenetics* **8**, 512-  
941 521, doi:10.4161/epi.24450 (2013).
- 942 50 Deng, Z. *et al.* A role for CTCF and cohesin in subtelomere chromatin organization, TERRA  
943 transcription, and telomere end protection. *Embo J* **31**, 4165-4178, doi:10.1038/emboj.2012.266  
944 (2012).
- 945 51 Porro, A., Feuerhahn, S., Reichenbach, P. & Lingner, J. Molecular dissection of telomeric repeat-  
946 containing RNA biogenesis unveils the presence of distinct and multiple regulatory pathways.  
947 *Mol Cell Biol* **30**, 4808-4817, doi:10.1128/MCB.00460-10 (2010).
- 948 52 Arnoult, N., Van Beneden, A. & Decottignies, A. Telomere length regulates TERRA levels through  
949 increased trimethylation of telomeric H3K9 and HP1alpha. *Nat Struct Mol Biol* **19**, 948-956,  
950 doi:10.1038/nsmb.2364 (2012).



- 951 53 Azzalin, C. M. & Lingner, J. Telomere functions grounding on TERRA firma. *Trends Cell Biol* **25**,  
952 29-36, doi:10.1016/j.tcb.2014.08.007 (2015).
- 953 54 Ito, S. *et al.* Role of Tet proteins in 5mC to 5hmC conversion, ES-cell self-renewal and inner cell  
954 mass specification. *Nature* **466**, 1129-1133, doi:nature09303 [pii]  
955 10.1038/nature09303 (2010).
- 956 55 Balk, B. *et al.* Telomeric RNA-DNA hybrids affect telomere-length dynamics and senescence. *Nat*  
957 *Struct Mol Biol* **20**, 1199-1205, doi:10.1038/nsmb.2662 (2013).
- 958 56 Yang, J. *et al.* Tet Enzymes Regulate Telomere Maintenance and Chromosomal Stability of  
959 Mouse ESCs. *Cell Rep* **15**, 1809-1821, doi:10.1016/j.celrep.2016.04.058 (2016).
- 960 57 Silvestre, D. C. *et al.* Alternative lengthening of telomeres in human glioma stem cells. *Stem Cells*  
961 **29**, 440-451, doi:10.1002/stem.600 (2011).
- 962 58 Chen, W., Xiao, B. K., Liu, J. P., Chen, S. M. & Tao, Z. Z. Alternative lengthening of telomeres in  
963 hTERT-inhibited laryngeal cancer cells. *Cancer Sci* **101**, 1769-1776, doi:10.1111/j.1349-  
964 7006.2010.01611.x (2010).
- 965 59 Chen, W. *et al.* Telomerase inhibition alters telomere maintenance mechanisms in laryngeal  
966 squamous carcinoma cells. *J Laryngol Otol* **124**, 778-783, doi:10.1017/S0022215109992854  
967 (2010).
- 968 60 De Lange, T. Telomere-related genome instability in cancer. *Cold Spring Harb Symp Quant Biol*  
969 **70**, 197-204, doi:10.1101/sqb.2005.70.032 (2005).
- 970 61 Osterwald, S. *et al.* PML induces compaction, TRF2 depletion and DNA damage signaling at  
971 telomeres and promotes their alternative lengthening. *J Cell Sci* **128**, 1887-1900,  
972 doi:10.1242/jcs.148296 (2015).
- 973 62 Lapasset, L. *et al.* Rejuvenating senescent and centenarian human cells by reprogramming  
974 through the pluripotent state. *Genes Dev* **25**, 2248-2253, doi:10.1101/gad.173922.111 (2011).
- 975 63 Zeichner, S. L. *et al.* Rapid telomere shortening in children. *Blood* **93**, 2824-2830 (1999).
- 976 64 Ferron, S. R. *et al.* Telomere shortening in neural stem cells disrupts neuronal differentiation and  
977 neuritogenesis. *J Neurosci* **29**, 14394-14407, doi:10.1523/JNEUROSCI.3836-09.2009 (2009).
- 978 65 Vaziri, H. & Benchimol, S. From telomere loss to p53 induction and activation of a DNA-damage  
979 pathway at senescence: the telomere loss/DNA damage model of cell aging. *Exp Gerontol* **31**,  
980 295-301 (1996).
- 981 66 Zhang, P. *et al.* TRF2 dysfunction elicits DNA damage responses associated with senescence in  
982 proliferating neural cells and differentiation of neurons. *J Neurochem* **97**, 567-581,  
983 doi:10.1111/j.1471-4159.2006.03779.x (2006).
- 984 67 Wang, Z., Wei, D. & Xiao, H. Methods of cellular senescence induction using oxidative stress.  
985 *Methods Mol Biol* **1048**, 135-144, doi:10.1007/978-1-62703-556-9\_11 (2013).
- 986 68 West, M. D. & Vaziri, H. Back to immortality: the restoration of embryonic telomere length  
987 during induced pluripotency. *Regenerative medicine* **5**, 485-488, doi:10.2217/rme.10.51 (2010).
- 988 69 Mathew, R. *et al.* Robust activation of the human but not mouse telomerase gene during the  
989 induction of pluripotency. *FASEB journal : official publication of the Federation of American*  
990 *Societies for Experimental Biology* **24**, 2702-2715, doi:10.1096/fj.09-148973 (2010).
- 991 70 Vaziri, H. *et al.* Spontaneous reversal of the developmental aging of normal human cells  
992 following transcriptional reprogramming. *Regenerative medicine* **5**, 345-363,  
993 doi:10.2217/rme.10.21 (2010).
- 994 71 Marion, R. M. & Blasco, M. A. Telomere rejuvenation during nuclear reprogramming. *Curr Opin*  
995 *Genet Dev* **20**, 190-196, doi:10.1016/j.gde.2010.01.005 (2010).
- 996 72 Marion, R. M. *et al.* Telomeres acquire embryonic stem cell characteristics in induced  
997 pluripotent stem cells. *Cell Stem Cell* **4**, 141-154, doi:10.1016/j.stem.2008.12.010 (2009).

- 998 73 Suhr, S. T. *et al.* Telomere dynamics in human cells reprogrammed to pluripotency. *PLoS ONE* **4**,  
999 e8124, doi:10.1371/journal.pone.0008124 (2009).
- 1000 74 Squillaro, T. *et al.* Partial silencing of methyl cytosine protein binding 2 (MECP2) in mesenchymal  
1001 stem cells induces senescence with an increase in damaged DNA. *FASEB J* **24**, 1593-1603,  
1002 doi:10.1096/fj.09-143057 (2010).
- 1003 75 Young, S. G., Meta, M., Yang, S. H. & Fong, L. G. Prelamin A farnesylation and progeroid  
1004 syndromes. *J Biol Chem* **281**, 39741-39745 (2006).
- 1005 76 Young, S. G., Fong, L. G. & Michaelis, S. Prelamin A, Zmpste24, misshapen cell nuclei, and  
1006 progeria--new evidence suggesting that protein farnesylation could be important for disease  
1007 pathogenesis. *J Lipid Res* **46**, 2531-2558 (2005).
- 1008 77 Robin, J. D. *et al.* Telomere position effect: regulation of gene expression with progressive  
1009 telomere shortening over long distances. *Genes Dev* **28**, 2464-2476,  
1010 doi:10.1101/gad.251041.114 (2014).
- 1011 78 Baur, J. A., Zou, Y., Shay, J. W. & Wright, W. E. Telomere position effect in human cells. *Science*  
1012 **292**, 2075-2077, doi:10.1126/science.1062329 (2001).
- 1013 79 Vera, E., Bosco, N. & Studer, L. Generating Late-Onset Human iPSC-Based Disease Models by  
1014 Inducing Neuronal Age-Related Phenotypes through Telomerase Manipulation. *Cell Rep* **17**,  
1015 1184-1192, doi:10.1016/j.celrep.2016.09.062 (2016).
- 1016 80 Bassi, L. *et al.* Pifithrin-alpha, an inhibitor of p53, enhances the genetic instability induced by  
1017 etoposide (VP16) in human lymphoblastoid cells treated in vitro. *Mutat Res* **499**, 163-176 (2002).
- 1018 81 Batista, L. F. *et al.* Telomere shortening and loss of self-renewal in dyskeratosis congenita  
1019 induced pluripotent stem cells. *Nature* **474**, 399-402, doi:10.1038/nature10084 (2011).
- 1020 82 Huang, K. *et al.* Selective demethylation and altered gene expression are associated with ICF  
1021 syndrome in human-induced pluripotent stem cells and mesenchymal stem cells. *Hum Mol*  
1022 *Genet* **23**, 6448-6457, doi:10.1093/hmg/ddu365 (2014).
- 1023 83 Sagie, S. *et al.* Induced pluripotent stem cells as a model for telomeric abnormalities in ICF type I  
1024 syndrome. *Hum Mol Genet* **23**, 3629-3640, doi:10.1093/hmg/ddu071 (2014).
- 1025 84 Yehezkel, S. *et al.* Characterization and rescue of telomeric abnormalities in ICF syndrome type I  
1026 fibroblasts. *Front Oncol* **3**, 35, doi:10.3389/fonc.2013.00035 (2013).
- 1027 85 Linhart, H. G. *et al.* Dnmt3b promotes tumorigenesis in vivo by gene-specific de novo  
1028 methylation and transcriptional silencing. *Genes Dev* **21**, 3110-3122, doi:10.1101/gad.1594007  
1029 (2007).
- 1030 86 Lu, F., Liu, Y., Jiang, L., Yamaguchi, S. & Zhang, Y. Role of Tet proteins in enhancer activity and  
1031 telomere elongation. *Genes Dev* **28**, 2103-2119, doi:10.1101/gad.248005.114 (2014).
- 1032 87 Pandey, S., Simmons, G. E., Jr., Malyarchuk, S., Calhoun, T. N. & Pruitt, K. A novel MeCP2  
1033 acetylation site regulates interaction with ATRX and HDAC1. *Genes Cancer* **6**, 408-421,  
1034 doi:10.18632/genesandcancer.84 (2015).
- 1035 88 Kernohan, K. D., Vernimmen, D., Gloor, G. B. & Berube, N. G. Analysis of neonatal brain lacking  
1036 ATRX or MeCP2 reveals changes in nucleosome density, CTCF binding and chromatin looping.  
1037 *Nucleic Acids Res* **42**, 8356-8368, doi:10.1093/nar/gku564 (2014).
- 1038 89 Baker, S. A. *et al.* An AT-hook domain in MeCP2 determines the clinical course of Rett syndrome  
1039 and related disorders. *Cell* **152**, 984-996, doi:10.1016/j.cell.2013.01.038 (2013).
- 1040 90 Kurahashi, H., Ohye, T., Inagaki, H., Kogo, H. & Tsutsumi, M. Mechanism of complex gross  
1041 chromosomal rearrangements: a commentary on concomitant microduplications of MECP2 and  
1042 ATRX in male patients with severe mental retardation. *J Hum Genet* **57**, 81-83,  
1043 doi:10.1038/jhg.2011.143 (2012).

- 1044 91 Kernohan, K. D. *et al.* ATRX partners with cohesin and MeCP2 and contributes to developmental  
1045 silencing of imprinted genes in the brain. *Dev Cell* **18**, 191-202, doi:10.1016/j.devcel.2009.12.017  
1046 (2010).
- 1047 92 Nan, X. *et al.* Interaction between chromatin proteins MECP2 and ATRX is disrupted by  
1048 mutations that cause inherited mental retardation. *Proc Natl Acad Sci U S A* **104**, 2709-2714,  
1049 doi:10.1073/pnas.0608056104 (2007).
- 1050 93 Watson, L. A. *et al.* Atrx deficiency induces telomere dysfunction, endocrine defects, and  
1051 reduced life span. *J Clin Invest* **123**, 2049-2063, doi:10.1172/JCI65634 (2013).
- 1052 94 Deng, Z. *et al.* Inherited mutations in the helicase RTEL1 cause telomere dysfunction and  
1053 Hoyeraal-Hreidarsson syndrome. *Proc Natl Acad Sci U S A* **110**, E3408-3416,  
1054 doi:10.1073/pnas.1300600110 (2013).
- 1055 95 Moog, U. *et al.* Subtelomeric chromosome aberrations: still a lot to learn. *Clin Genet* **68**, 397-  
1056 407, doi:10.1111/j.1399-0004.2005.00506.x (2005).
- 1057 96 De Vries, B. B., Winter, R., Schinzel, A. & van Ravenswaaij-Arts, C. Telomeres: a diagnosis at the  
1058 end of the chromosomes. *J Med Genet* **40**, 385-398 (2003).
- 1059 97 Tan, F. C., Hutchison, E. R., Eitan, E. & Mattson, M. P. Are there roles for brain cell senescence in  
1060 aging and neurodegenerative disorders? *Biogerontology* **15**, 643-660, doi:10.1007/s10522-014-  
1061 9532-1 (2014).
- 1062 98 Miller, J. D. *et al.* Human iPSC-based modeling of late-onset disease via progerin-induced aging.  
1063 *Cell Stem Cell* **13**, 691-705, doi:10.1016/j.stem.2013.11.006 (2013).
- 1064 99 Zoghbi, H. Y. Rett Syndrome and the Ongoing Legacy of Close Clinical Observation. *Cell* **167**, 293-  
1065 297, doi:10.1016/j.cell.2016.09.039 (2016).
- 1066 100 Yang, L. Y. *et al.* Post-traumatic administration of the p53 inactivator pifithrin- $\alpha$  oxygen  
1067 analogue reduces hippocampal neuronal loss and improves cognitive deficits after experimental  
1068 traumatic brain injury. *Neurobiol Dis* **96**, 216-226, doi:10.1016/j.nbd.2016.08.012 (2016).
- 1069 101 Zhang, P. *et al.* Regenerative repair of Pifithrin- $\alpha$  in cerebral ischemia via VEGF dependent  
1070 manner. *Sci Rep* **6**, 26295, doi:10.1038/srep26295 (2016).
- 1071 102 Yang, L. Y. *et al.* Post-trauma administration of the pifithrin- $\alpha$  oxygen analog improves  
1072 histological and functional outcomes after experimental traumatic brain injury. *Exp Neurol* **269**,  
1073 56-66, doi:10.1016/j.expneurol.2015.03.015 (2015).
- 1074 103 Lindgren, A. G. *et al.* Loss of Pten causes tumor initiation following differentiation of murine  
1075 pluripotent stem cells due to failed repression of Nanog. *PLoS One* **6**, e16478,  
1076 doi:10.1371/journal.pone.0016478 (2011).
- 1077 104 Patterson, M. *et al.* let-7 miRNAs Can Act through Notch to Regulate Human Gliogenesis. *Stem*  
1078 *cell reports*, doi:10.1016/j.stemcr.2014.08.015 (2014).
- 1079 105 Karumbayaram, S. *et al.* Directed differentiation of human-induced pluripotent stem cells  
1080 generates active motor neurons. *Stem Cells* **27**, 806-811 (2009).
- 1081 106 Lowry, W. E. *et al.* Generation of human induced pluripotent stem cells from dermal fibroblasts.  
1082 *Proc Natl Acad Sci U S A* **105**, 2883-2888 (2008).
- 1083 107 Song, C. X. *et al.* Selective chemical labeling reveals the genome-wide distribution of 5-  
1084 hydroxymethylcytosine. *Nat Biotechnol* **29**, 68-72, doi:nbt.1732 [pii]  
1085 10.1038/nbt.1732 (2011).
- 1086 108 Song, C. X., Yi, C. & He, C. Mapping recently identified nucleotide variants in the genome and  
1087 transcriptome. *Nature biotechnology* **30**, 1107-1116, doi:10.1038/nbt.2398 (2012).

1088

1089

## 1090 **Figure Legends**

### 1091 **Figure 1. Generation of isogenic model of Rett Syndrome *in vitro***

1092 **A**, Fibroblasts isolated from Rett Syndrome patients (R982 and R567) heterozygous for  
1093 MECP2 mutations exhibit a mosaic pattern of MECP2 expression due to random XCI.  
1094 Note that roughly 50% of fibroblasts from each patient express MECP2. **B**, Multiple  
1095 isogenic hiPSC lines were produced from patient 982 with a typical Yamanaka protocol  
1096 yielding individual isogenic clones with and without MECP2 expression from the same  
1097 patient, as judged by NANOG and OCT4 staining. **C**, Specification of 982 patient  
1098 derived hiPSCs towards neural progenitor cells yielded homogenous cultures of NPCs  
1099 with and without MECP2. **D**, terminal differentiation of 982 patient derived NPCs  
1100 towards neurons and glial by growth factor withdrawal yielded normal neural derivatives  
1101 as measured by immunostaining for MAP2 and GFAP. **E**, MECP2<sup>+</sup> and MECP2<sup>-</sup>  
1102 hiPSCs and neurons were generated from patient 982 (R982.16 and R982.15) and  
1103 assayed for activity of the AKT pathway by western blot with antibodies that recognize  
1104 the active forms of Akt and its downstream target S6. **F**, Sholl assay of dendritic  
1105 complexity was performed on WT vs MUT neurons derived from patient 982. Increased  
1106 # of branch points indicates increased dendritic complexity, measured as a function of  
1107 distance from the cell body. \*p value < 0.05 according to student's t test. Bar graphs  
1108 represent mean +/- SEM.

### 1109 **Figure 2. Hypomethylation of 5-hydroxymethylcytosine in MECP2 null cells**

1110 **A**, The overall delta methylation signal distribution is shown. The cutoff was made  
1111 based on the difference of 0.2 per million reads per base pair. **B**, Number of differential

1112 5hmC regions (DhmRs) are presented as either gain of 5hmC (hypermethylated) or loss  
1113 of 5hmC (hypomethylated) in each patient line, comparing MECP+ clones to MECP2-  
1114 clones. Differential hydroxymethylation pattern between clones from 982 and 567 shows  
1115 the overall delta-methylation as hypomethylation. **C**, Localization of DhmRs within  
1116 various genomic features relative to the portion of those features in the genome. The  
1117 highest concentration of DhmRs was found in coding exons (light green). **D**, Mapping  
1118 DhmRs across metachromosomes representing the relative location across all  
1119 chromosomes shows an increase in DhmRs towards the ends of chromosomes. The y-  
1120 axis represents the differences of normalized methylation signal (piled-up signal per  
1121 million mapped reads) between wild-type and mutant. **E**, Immunostaining for 5hmC in  
1122 hiPSC clones from patients 982 and 567 indicated that levels of this DNA methylation  
1123 mark are considerably lower in MECP2 null hiPSC clones. **F**, 5hmC staining was  
1124 quantified in hiPSCs derived from both patient 567 and 982. \*p value < 0.05 according  
1125 to student's t test. Bar graphs represent mean +/- SEM.

1126

1127 **Figure 3. Loss of MECP2 is associated with differential gene expression**  
1128 **particularly in neurons.**

1129 **A**, Immunostaining neurons generated from patient 982 for TuJ1, a neuronal-specific  
1130 marker. **Right**, quantification of dendritic complexity by counting endpoints shows a  
1131 significant difference between neurons with and without MECP2 made from patient 982.  
1132 **B**, Volcano plots of differentially expressed genes (DEGs) in hiPSCs, NPCs and  
1133 Neurons shows that loss of MECP2 has a profound effect on gene expression in

1134 neurons. **C**, Gene ontological analysis of DEGs increased versus decreased in MECP2  
1135 null neurons. **D**, DEGs were mapped to a metachromosome to determine their relative  
1136 location across chromosomes. In general, upregulated DEGs were enriched towards  
1137 the ends of chromosomes, while downregulated DEGs showed no clear pattern of  
1138 location. **E**, DEG and DhmrRs are statistically significantly overlapped in hiPSCs. This  
1139 analysis was performed by randomly select the same number of genes with iPSC FDR  
1140 DEG from the hg19 genes, then calculating the overlapping with hmC DMRs in a  
1141 permutation test performed 5,000 times. The permuted number of overlapping genes  
1142 is shown in the parentheses.

1143

1144 **Figure 4. Loss of MECP2 leads to induction of subtelomeric genes including**  
1145 **TERRA, a long non-coding RNA**

1146 **A**, RT-PCR for subtelomeric genes in hiPSCs, NPCs and neurons derived from  
1147 patients. **B**, RT-PCR for subtelomeric genes in WT NPCs with silencing of MECP2 by  
1148 siRNA. **C**, RT-PCR for subtelomeric genes in WT brain tissue derived NPCs with  
1149 silencing of MECP2 by siRNA. **D**, RT-PCR with the same samples described in **A**, **B**  
1150 and **C** for TERRA transcripts. **E**, Silencing of TET expression by siRNA was assessed  
1151 by RT-PCR. **F**, Knockdown of TET followed by RT-PCR for TERRA transcripts and  
1152 subtelomeric genes also showed that loss of 5hmC is associated with induction of  
1153 subtelomeric gene expression. In this figure, all data presented are the resulting relative  
1154 fold change differences found in at least three biologically independent experiments. In  
1155 addition, student's t-test was performed across all three or more experiments, and those

1156 with a p-value < 0.05 are indicated with an asterisk. Bar graphs represent mean +/-  
1157 SEM. The identity of cells used in each replicate experiment are described in  
1158 Supplemental Table 1.

1159

## 1160 **Figure 5. Loss of MECP2 is associated with telomere shortening**

1161 **A**, Quantitative PCR for telomere length based on a ratio of telomere product versus an  
1162 autosomal locus (T/S ratio) showed that loss of MECP2 in patients or by siRNA for  
1163 MECP2 is associated with shorter telomeres in hiPSCs, NPCs and neurons. The data  
1164 presented are the result of at least three biologically independent experiments, and  
1165 asterisks indicated p-value < 0.05 according to student's t test. Bar graphs represent  
1166 mean +/- SEM. A complete sample list across all experiments used is provided in  
1167 Supplemental Table 1. **B**, As an independent method, quantitative FISH was performed  
1168 for telomere length as a function of centromere size. **Bottom**, quantification of telomere  
1169 length in NPCs in two separate experiments from patient 982. **C**, Southern blotting with  
1170 genomic DNA and a telomere specific probe showed telomere shortening in the  
1171 absence of MECP2 in hiPSCs and NPCs derived from patient 982.

1172

## 1173 **Figure 6. Physiological consequences to telomere shortening in the absence of** 1174 **MECP2**

1175 Immunostaining for H2aX and PML can identify cells with telomere dysfunction. **A**,  
1176 Immunostaining NPCs in the absence of MECP2 showed a strong increase in H2aX,

1177 which was quantified as a function of SOX2 immunostaining in 567 derived NPCs. **B**,  
1178 Immunostaining NPCs in the absence of MECP2 showed a strong increase in PML,  
1179 which was quantified as a function of SOX2 immunostaining in 982 derived NPCs. **C**,  
1180 Immunostaining for p53 and p21, a target of p53, showed an increase of these stress  
1181 markers in MECP2 null neurons derived from patient 567. **D**, Cells undergoing  
1182 senescence show upregulation of endogenous b-galactosidase activity. Clones of  
1183 fibroblasts lacking MECP2 showed strong b-gal activity, while those of WT fibroblasts  
1184 did not. **E**, The senescence assay applied to neuronal cultures showed a strong  
1185 increase in the absence of MECP2. **F**, Treatment of MECP2-null neurons with DMSO  
1186 or Pifithrin, followed by immunostaining with antibody for TuJ1 shows a change in  
1187 dendritic branching and morphology following treatment with Pifithrin. Bottom left, RT-  
1188 PCR for GADD45, a p53 target gene, showed that Pifithrin reduced p53 activity. Bottom  
1189 right, Quantification of branching phenotype across three independent experiments  
1190 showed a strong increase in branching as measured by the number of endpoints. **G**,  
1191 Schematic to depict molecular events known to regulate the ends of chromosomes.  
1192 Shown on the right is the result of loss of MECP2, which according to immunostaining  
1193 and senescence activity assays, led to neuronal stress and TIF. In this figure, all data  
1194 resulted from at least three independent experiments. \*p value<0.05 according to  
1195 student's t test. Bar graphs represent mean +/- SEM.

1196

1197 **Figure 7. Rett patient brains show telomere shortening and induction of p53**



1198 **A**, Female Rett patient brains show variable XCI skewing in neurons as judged by  
1199 immunostaining for MECP2, and quantified as a function of DAPI and MAP2 staining.  
1200 **B**, Southern blotting of genomic DNA with a telomere specific probe shows the average  
1201 telomere length in both control (5559) and Rett (1815) brain compared to ladder (right).  
1202 **C**, qPCR from genomic DNA of aged matched Rett patient brains and control brains. **D**,  
1203 As measured by RT-PCR, Rett patient brains show an increase in TERRA transcripts  
1204 compared to aged-match controls.  $N \geq 3$  independent experiments. Bar graphs  
1205 represent mean  $\pm$  SEM. **E**, Extended characterization of patient 1815 and 5784  
1206 showed increased expression of PML specifically in MECP2 null neurons in each of  
1207 these two patient brains. Yellow inset is a magnification of box showing high  
1208 magnification of PML staining specifically in MECP2 null neurons. Right panel shows  
1209 quantification of PML signal in Rett patient brain, comparing the signal in MECP2+  
1210 versus MECP2- neurons. **F**, Immunostaining Rett brain for MECP2 and p53 shows  
1211 higher levels of p53 specifically in MECP2- neurons (quantified on the right).

1212

### 1213 **Figure 1-figure supplement 1. hiPSCs lacking MECP2 are pluripotent**

1214 Teratoma assay was performed to establish pluripotency of hiPSCs made from Rett  
1215 patient fibroblasts. The resulting tumors each showed evidence of differentiation  
1216 towards all three embryonic germ layers.

1217

### 1218 **Figure 1-figure supplement 2. Similarity of NPCs generated with and without** 1219 **MECP2**

1220 **A**, NPCs were produced from isogenic hiPSCs of Rett patient, and assessed by western  
1221 blot to validate loss of MECP2 and specificity of antibody. Top panel shows that the  
1222 antibody only recognizes MECP2. Bottom panel shows that in NPCs from both  
1223 patients, individual clones either express or lack MECP2. **B**, The ability of hiPSCs to  
1224 generate NPCs was assayed in Rosette formation assay. Lack of MECP2 did not affect  
1225 rosette formation across multiple lines from both patients. N=4 independent  
1226 experiments. \*p value < 0.05 according to student's t test (for patient R567) or ANOVA  
1227 (for patient R982). Bar graphs represent mean +/- SEM. **C**, Growth curves show that  
1228 loss of MECP2 does not affect proliferation of NPCs made from either patient. **D**, 3  
1229 weeks of growth factor withdrawal drives NPCs to differentiate into neurons and glia as  
1230 measured here by immunostaining for MAP2/Tuj1 or S100/GFAP in patient 567 derived  
1231 cultures. There was no consistent difference in differentiation potential across lines  
1232 from either patient. N=2 independent experiments. Bar graphs represent mean +/-  
1233 SEM. **E**, Patient 982 derived cultures also do not show dramatic differences in the  
1234 presence of neurons or astrocytes as measured by MAP2 and S100. N=3 independent  
1235 experiments. Bar graphs represent mean +/- SEM.

1236

1237 **Figure 3-figure supplement 1. RNA-seq analysis to determine the relative ration**  
1238 **of WT versus MUT transcripts of MECP2 in Rett patient derived lines.** Detection of  
1239 WT and MUT transcripts from each of the lines indicated demonstrated a clear bias  
1240 towards individual alleles in each patient derived line. This analysis indicates XCI status  
1241 for each allele, and demonstrates that XCI status is unchanged, even after  
1242 differentiation to neurons.

1243

1244 **Figure 3-figure supplement 2.** **A**, Immunofluorescence of interneuron progenitors  
1245 from WT (**top**) or MECP2null (**bottom**) clones. **B**, Immunofluorescence of interneurons  
1246 generated from a MECP2null hiPSC clone generated by 3i protocol. **C**, Volcano plots of  
1247 lower stringency DEGs in hiPSCs and NPCs between MECP2+ versus MECP2- clones  
1248 (p-value < 0.05). **D**, Mapping of low stringency DEGs in hiPSCs and NPCs across  
1249 metachromosome to measure enrichment of DEG location.

1250

1251 **Figure 4-figure supplement 1. Silencing MECP2 by siRNA**

1252 MECP2 was downregulated by RNA interference, quantified by RT-PCR (left), for  
1253 protein by western blot (middle), and as demonstrated by immunostaining for MECP2  
1254 (right). N=3 independent experiments. \*p value < 0.05 according to student's t test. Bar  
1255 graphs represent mean +/- SEM.

1256

1257 **Figure 6-figure supplement 1. Transduction of Progerin leads to phenotypes**

1258 **similar to loss of MECP2.** **A**, Cells undergoing senescence are known to induce and  
1259 secrete a group of genes called SASP. RNA-seq data from neurons were mined for  
1260 SASP genes, and shown are those SASP genes that were differentially expressed  
1261 between patient derived neurons with and without MECP2. **B**, qPCR for telomere length  
1262 in WT NPCs showed that Progerin infected cells have on average shorter telomeres.  
1263 N=3 independent experiments. \*p value < 0.05 according to student's t test. Bar graphs  
1264 represent mean +/- SEM. **C**, RT-PCR from progerin infected NPCs showed an

1265 induction of various subtelomeric genes. N≥3 independent experiments. \*p value<0.05  
1266 according to student's t test. Bar graphs represent mean +/- SEM. **D**, RT-PCR for  
1267 TERRA transcripts following progerin transduction. N≥3 independent experiments. \*p  
1268 value < 0.05 according to student's t test. Bar graphs represent mean +/- SEM. **E**,  
1269 Immunostaining for p53 following progerin expression. Quantification of p53 in infected  
1270 cells (either Nuclear-GFP or Progerin-GFP) is shown on the right. \*p value < 0.05  
1271 according to student's t test. Bar graphs represent mean +/- SEM.

1272

1273 **Supplemental Table 1.**

1274 Provided is a list of all cell types analyzed across the RT-PCR and Telomere qPCR  
1275 experiments performed in this manuscript.

1276 **Supplemental Table 2.**

1277 Provided is a list of all the primers used in this study.

1278

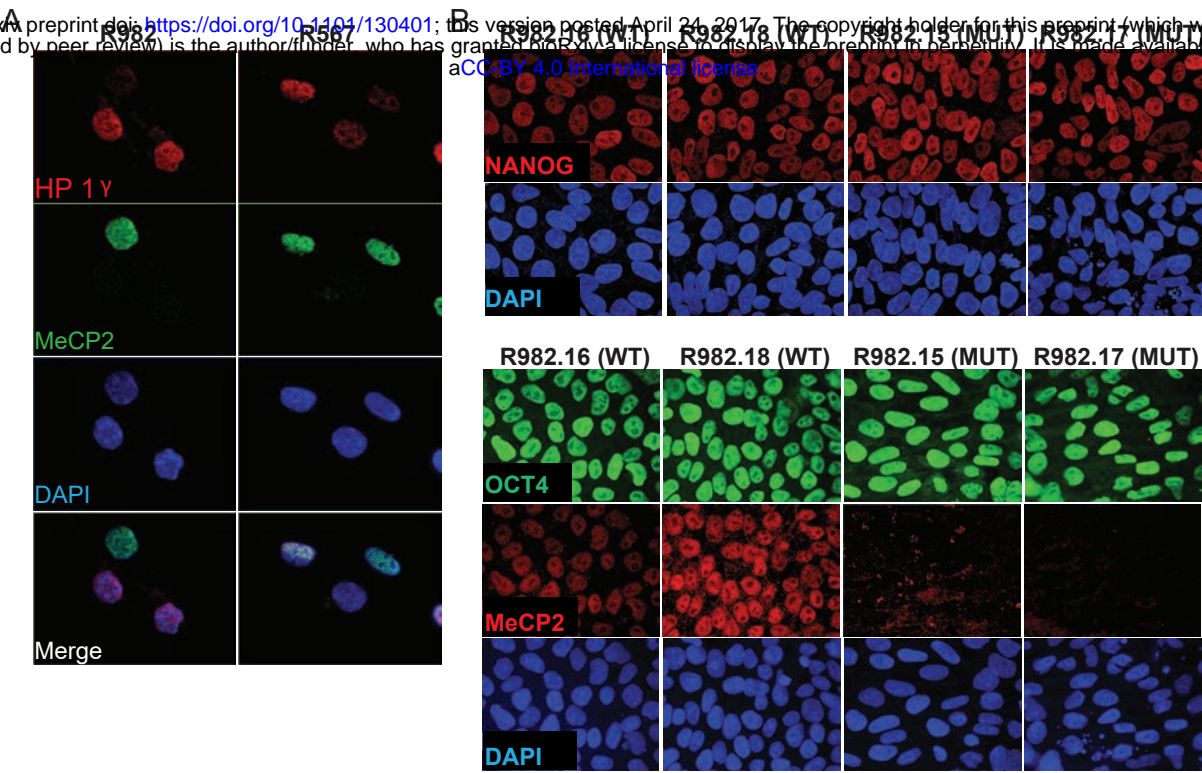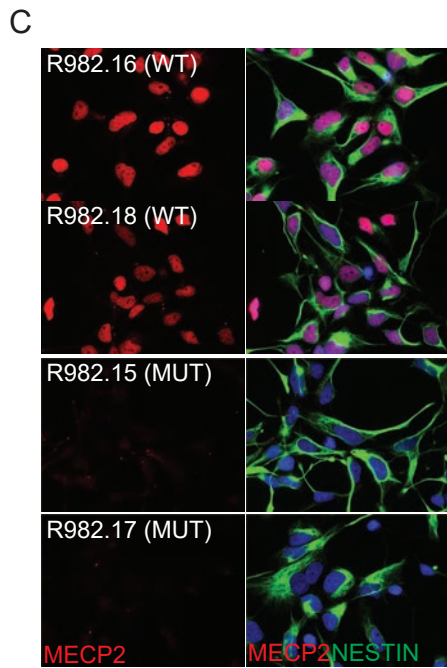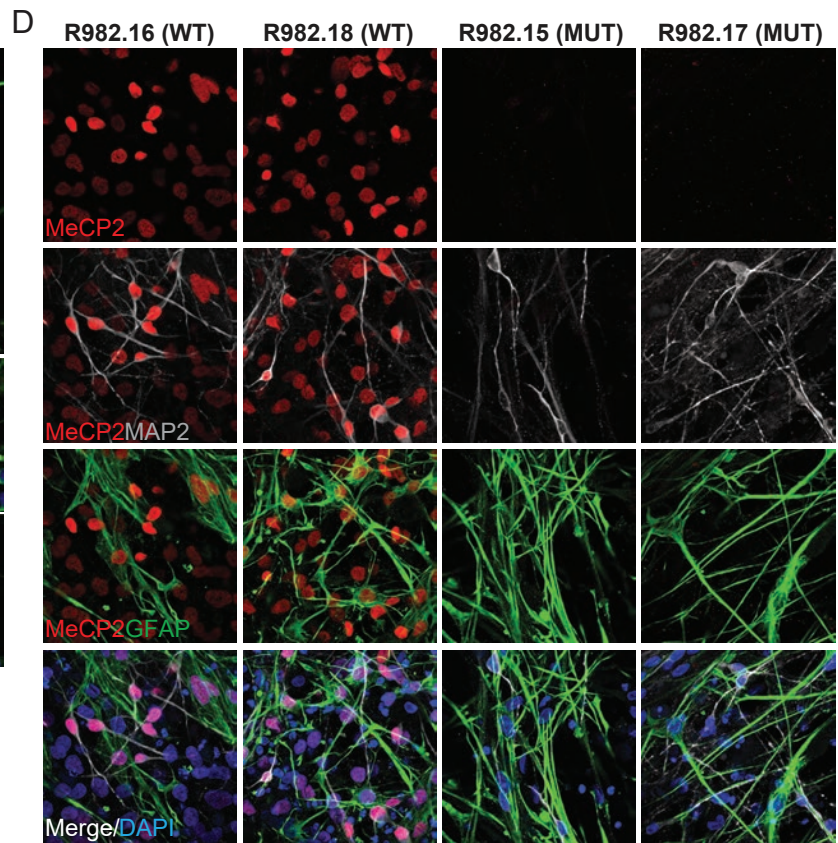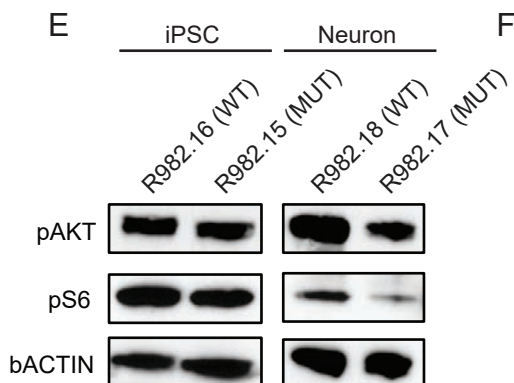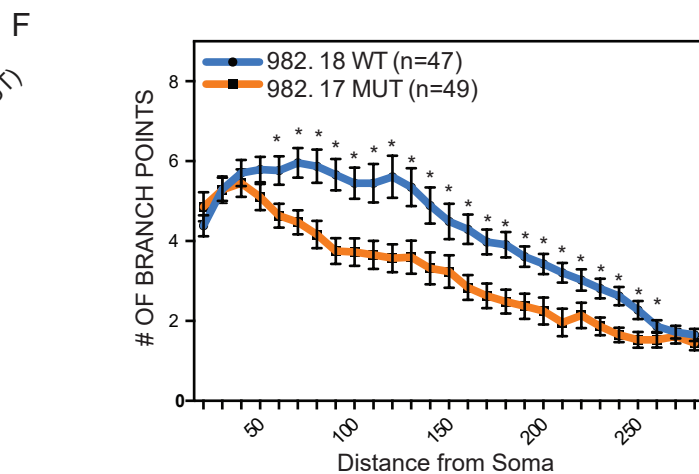

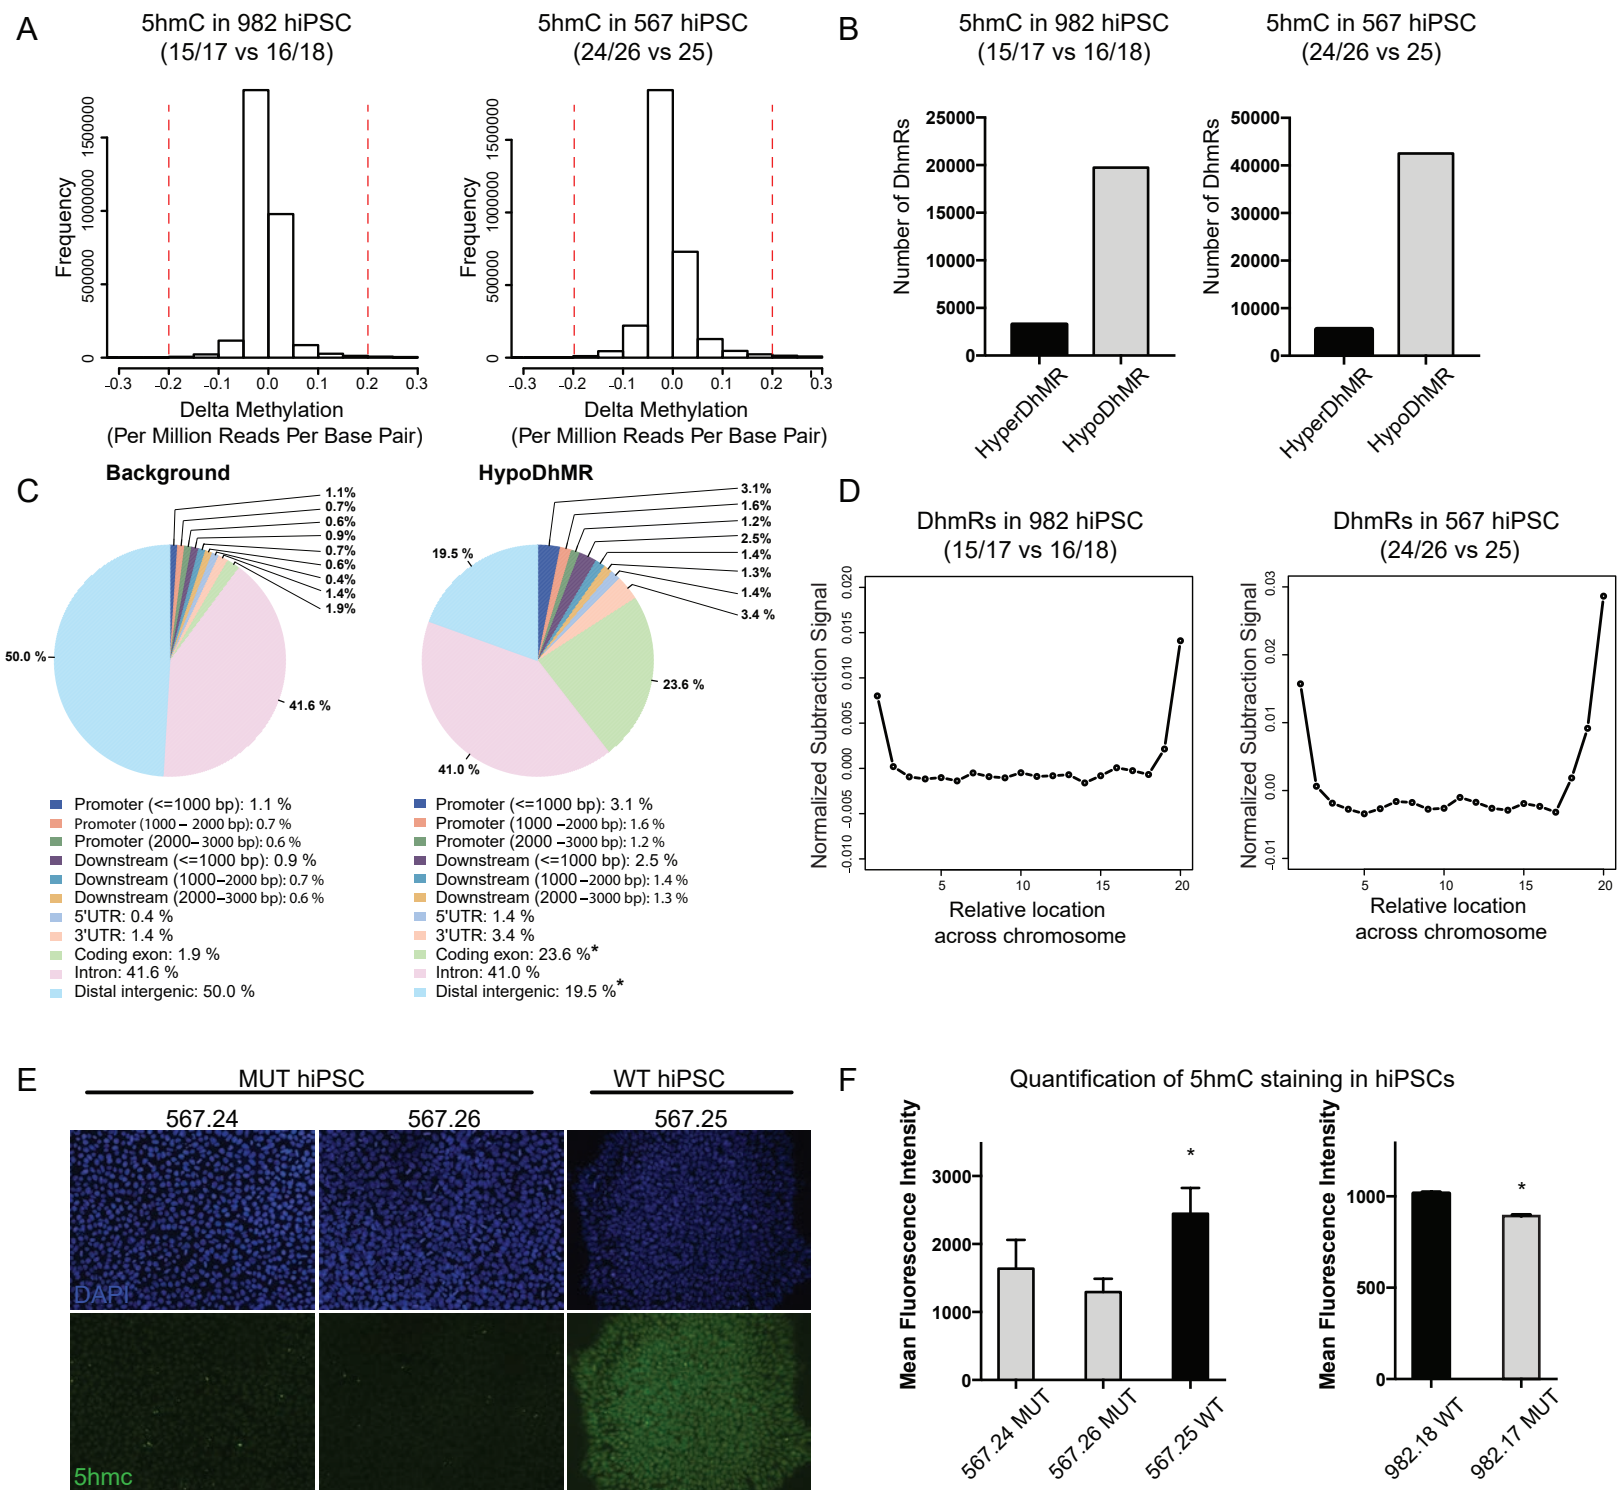

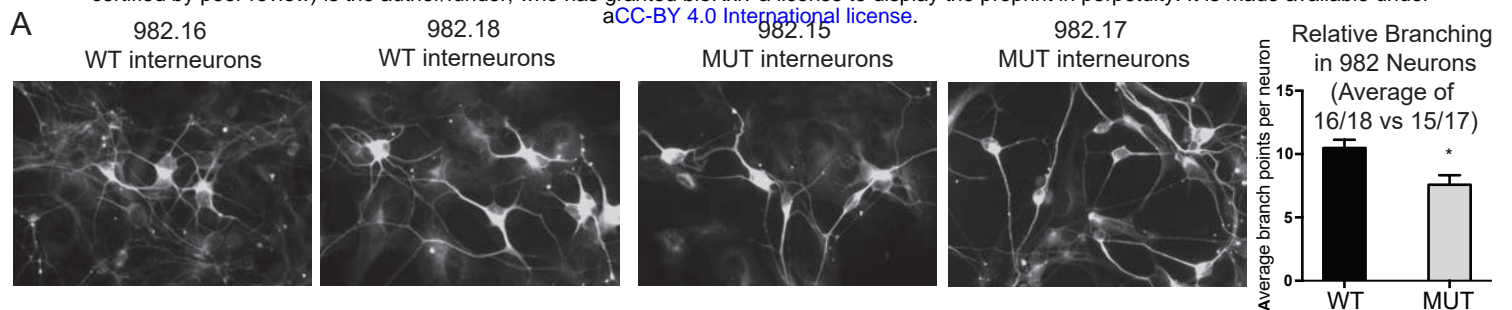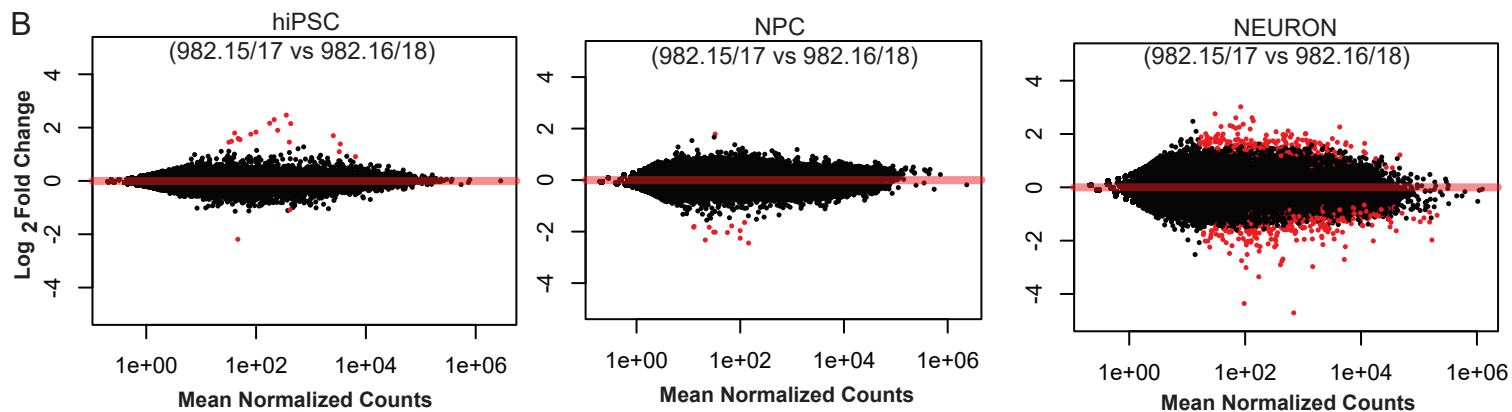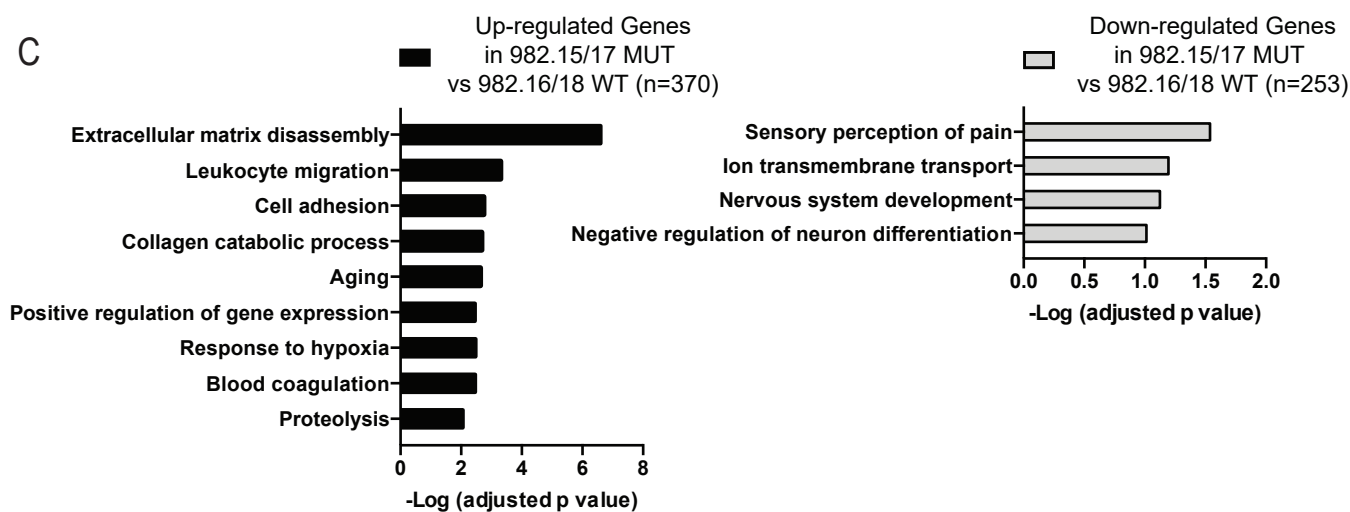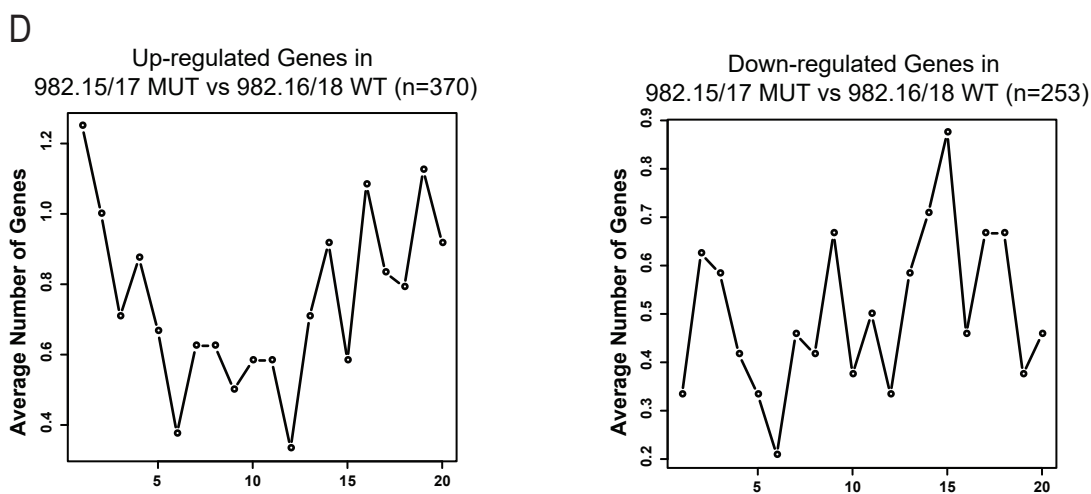

**E**

| Number of DEG (hiPSCs) | Overlap with Hyper DhMR | Overlap with Hypo DhMR |
|------------------------|-------------------------|------------------------|
| 20                     | 5 (1)                   | 19 (6)                 |

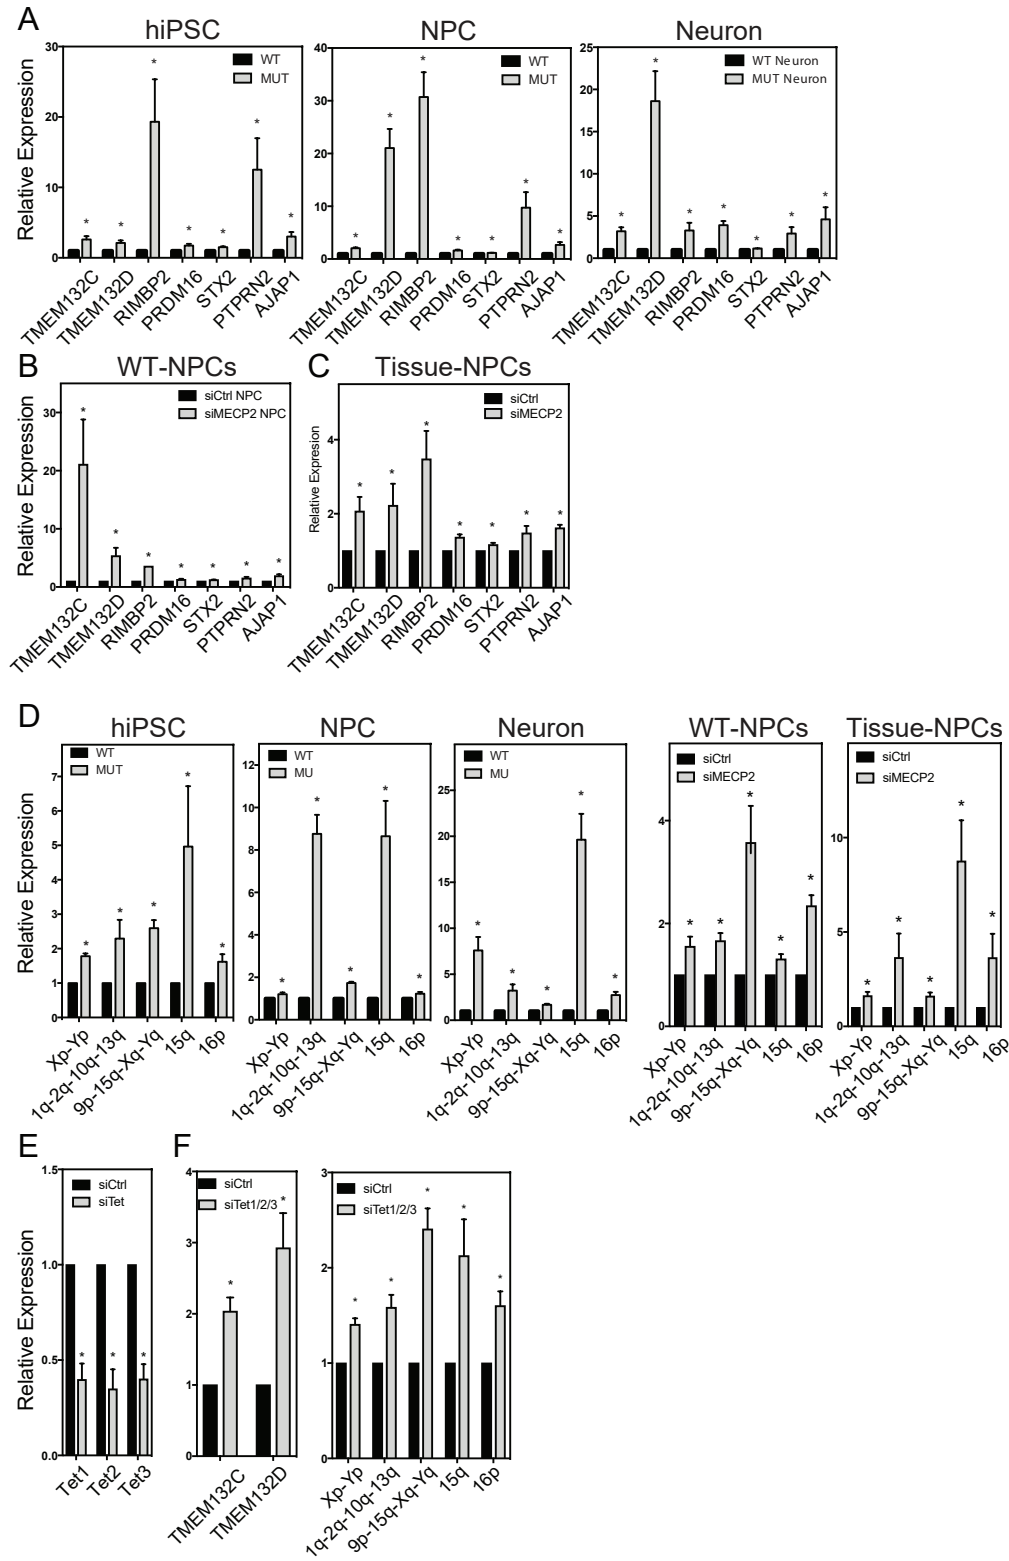



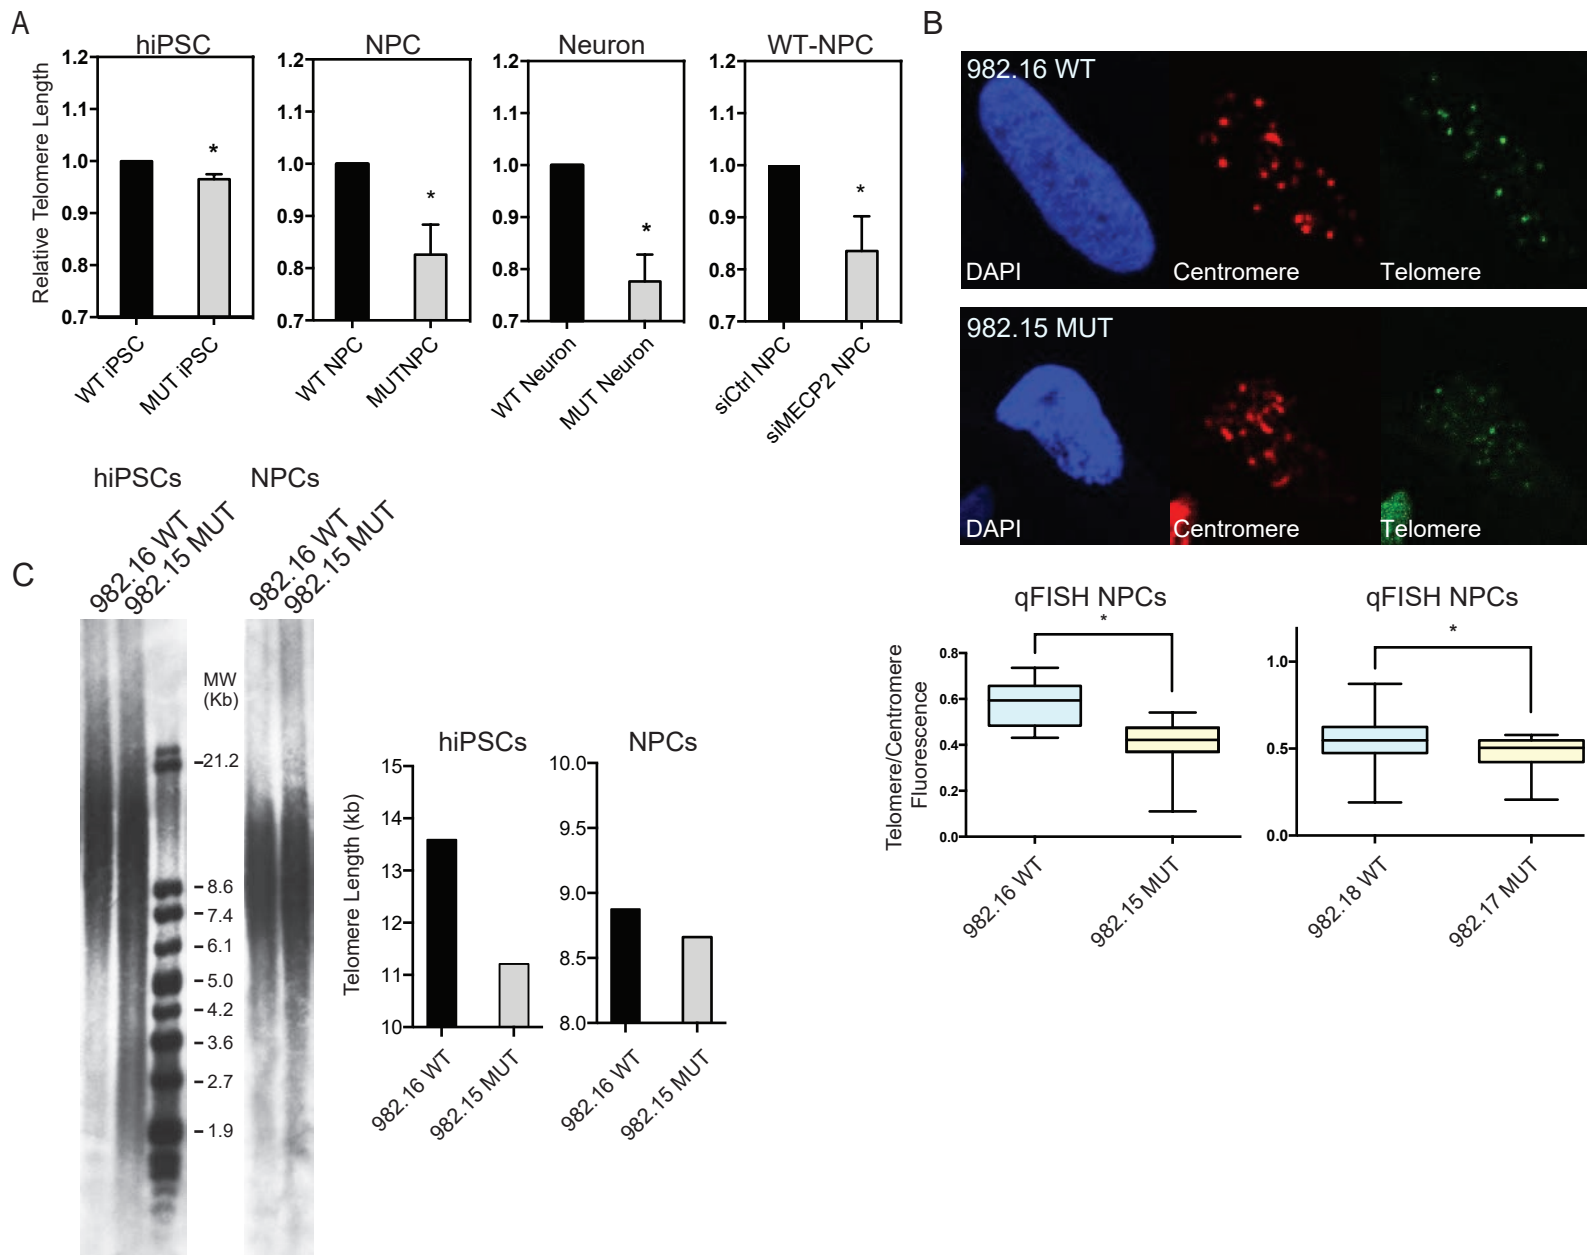

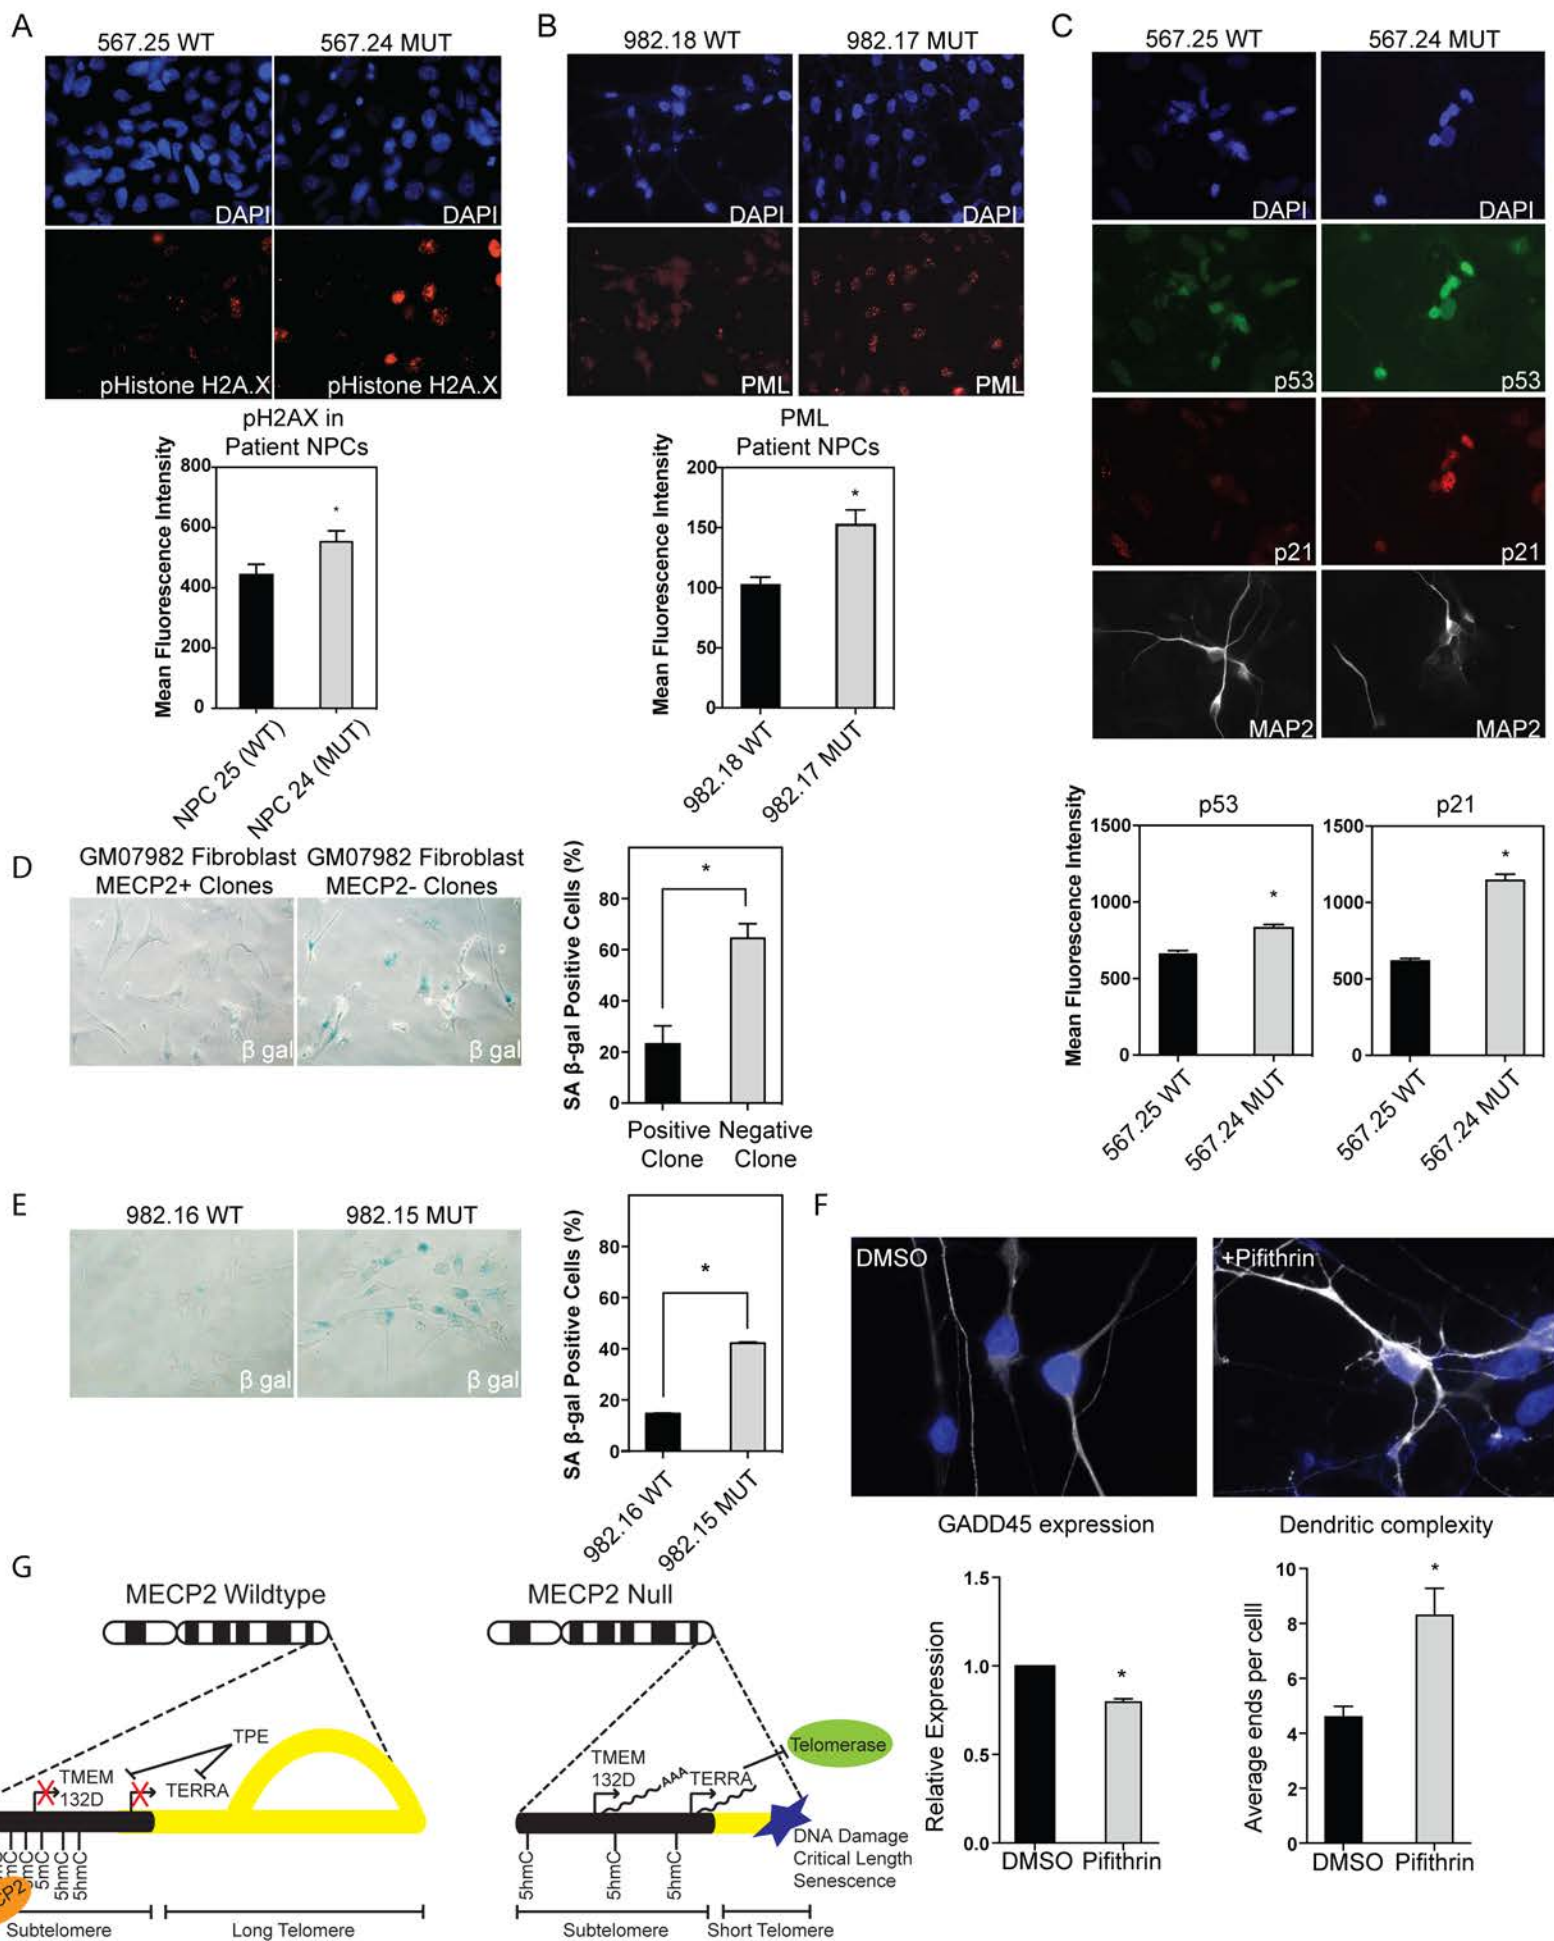

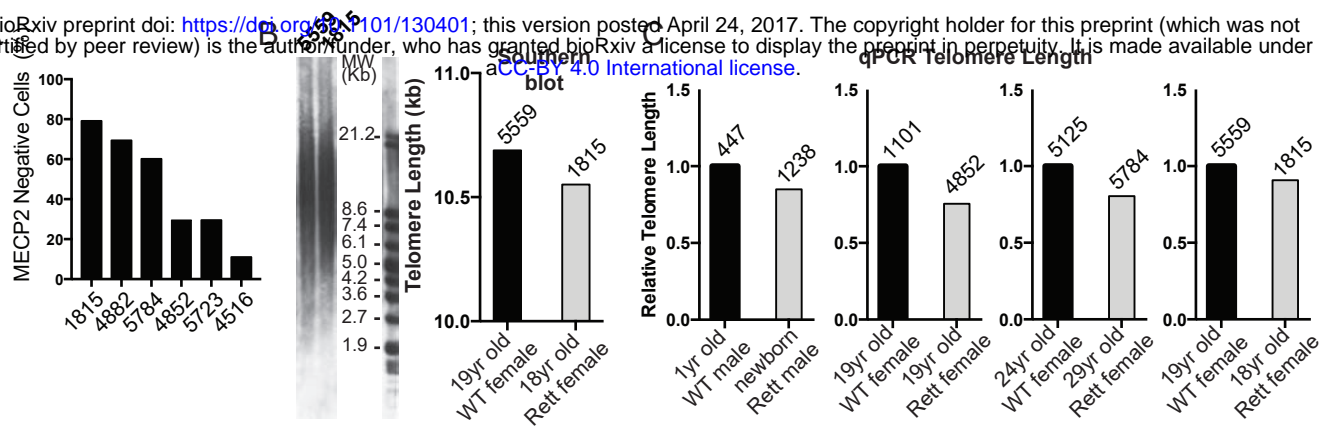

**D**

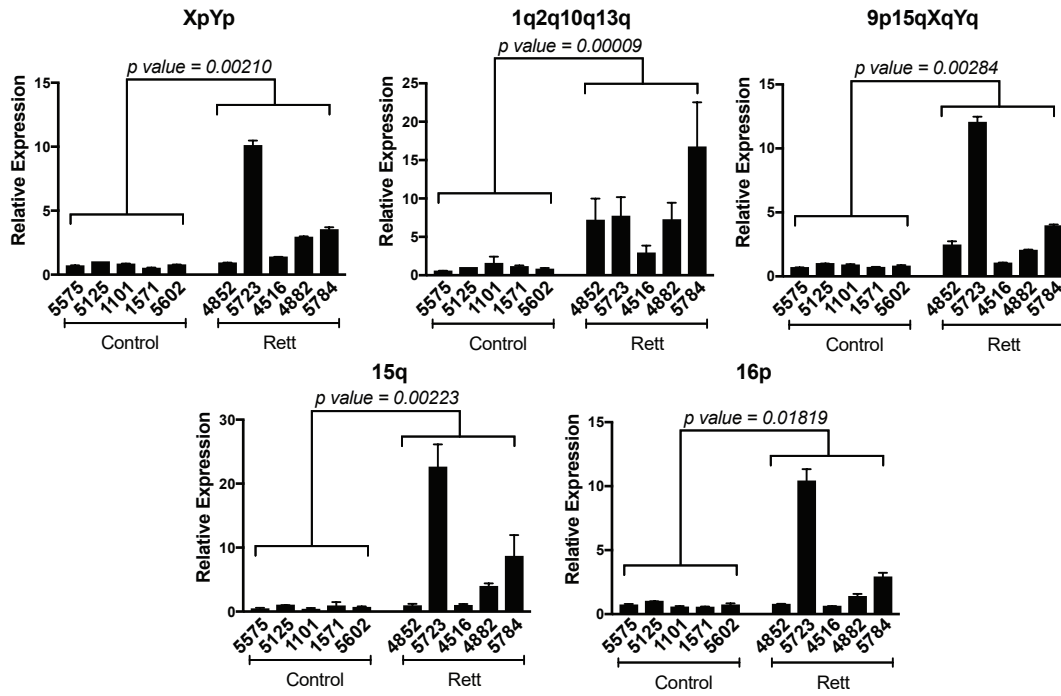

**E**

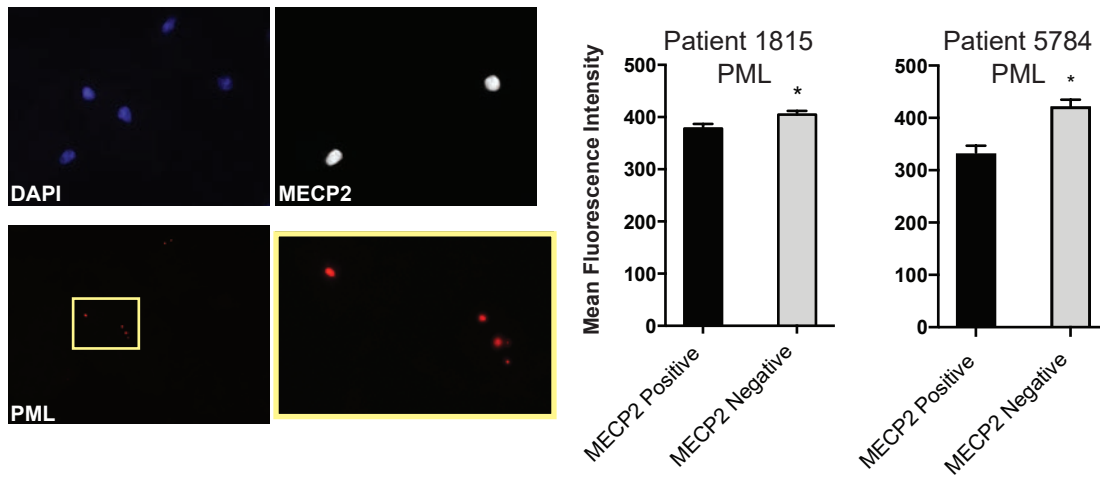

**F**

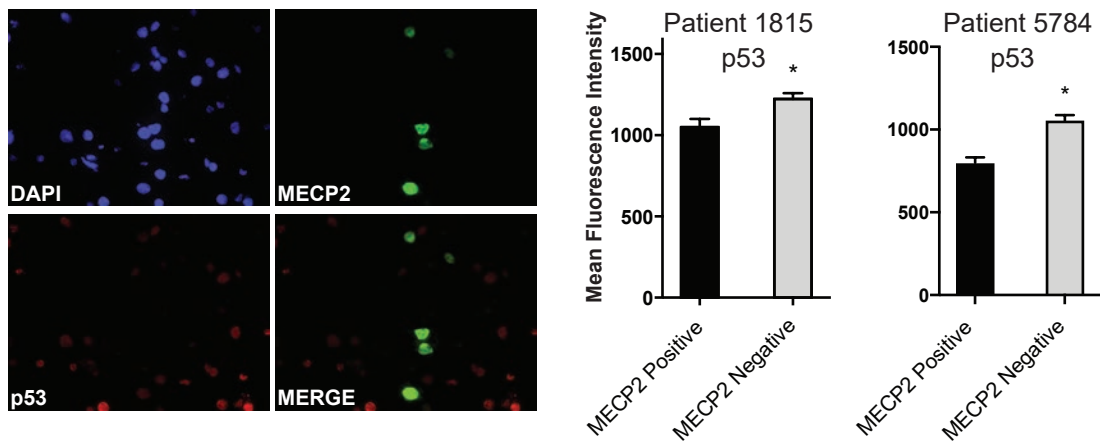

|                     | N (biological   gene | Sample        | Correspondir | Date of Experiments |          |          |
|---------------------|----------------------|---------------|--------------|---------------------|----------|----------|
| <b>HIPS Terra</b>   | 3 Xp-Yp              | 24/25         | Fig4D        | 20151028            |          |          |
|                     |                      | 25/26         | Fig4D        | 20151028            |          |          |
|                     | 5 1q_2q_10q_1        | 25/26         | Fig4D        | 20151028            |          |          |
|                     |                      | 15/16         | Fig4D        | 20160602            |          |          |
|                     |                      | 15/16         | Fig4D        | 20160222            |          |          |
|                     |                      | 24/25         | Fig4D        | 20151028            |          |          |
|                     |                      | 25/26         | Fig4D        | 20151028            |          |          |
|                     |                      | 15/16         | Fig4D        | 20151102            |          |          |
|                     | 3 9p_15q_Xq_1        | 15/16         | Fig4D        | 20160602            |          |          |
|                     |                      | 15/16         | Fig4D        | 20160222            |          |          |
|                     |                      | 24/25         | Fig4D        | 20151028            |          |          |
|                     |                      | 6 15q         | 15/16        | Fig4D               | 20160420 |          |
|                     |                      | 15/16         | Fig4D        | 20160512            |          |          |
|                     | <b>NPC Terra</b>     | 4 Xp-Yp       | 15/16        | Fig4D               | 20151102 |          |
|                     |                      |               | 17/18        | Fig4D               | 20160420 |          |
|                     |                      |               | 24/25        | Fig4D               | 20151102 |          |
|                     |                      |               | 15/16        | Fig4D               | 20160602 |          |
|                     |                      |               | 3 16p        | 17/18               | Fig4D    | 20160420 |
|                     |                      |               | 15/16        | Fig4D               | 20160222 |          |
|                     |                      |               | 24/25        | Fig4D               | 20151102 |          |
| 17/18               |                      |               | Fig4D        | 20151113            |          |          |
| 17/18               |                      |               | Fig4D        | 20151113            |          |          |
| 17/18               |                      |               | Fig4D        | 20151113            |          |          |
| <b>Neuron Terra</b> | 3 1q_2q_10q_1        | 17/18         | Fig4D        | 20151027            |          |          |
|                     |                      | 17/18         | Fig4D        | 20151027            |          |          |
|                     |                      | 17/18         | Fig4D        | 20151109            |          |          |
|                     |                      | 3 9p_15q_Xq_1 | 17/18        | Fig4D               | 20151027 |          |
|                     |                      | 17/18         | Fig4D        | 20151027            |          |          |
|                     |                      | 17/18         | Fig4D        | 20151109            |          |          |
|                     |                      | 3 15q         | 15/16        | Fig4D               | 20150501 |          |
|                     |                      | 15/16         | Fig4D        | 20151113            |          |          |
|                     |                      | 17/18         | Fig4D        | 20151113            |          |          |
|                     |                      | 3 16p         | 17/18        | Fig4D               | 20150508 |          |
|                     |                      | 17/18         | Fig4D        | 20160825            |          |          |
|                     |                      | 25/26         | Fig4D        | 20160825            |          |          |
| <b>HIPS Terra</b>   | 3 Xp-Yp              | 24/25         | Fig4D        | 20160527            |          |          |
|                     |                      | 26/25         | Fig4D        | 20160527            |          |          |
|                     |                      | 26/25         | Fig4D        | 20160323            |          |          |
|                     |                      | 3 1q_2q_10q_1 | 15/16        | Fig4D               | 20160323 |          |
|                     |                      | 26/25         | Fig4D        | 20160323            |          |          |
|                     |                      | 17/18         | Fig4D        | 20160527            |          |          |

|                    |              |         |          |          |
|--------------------|--------------|---------|----------|----------|
| <b>HIPS Subtel</b> | 3 9p_15q_Xq_ | 17/18   | Fig4D    | 20160527 |
|                    |              | 26/25   | Fig4D    | 20160323 |
|                    |              | L15/L16 | Fig4D    | 20160624 |
|                    | 3 15q        | 26/25   | Fig4D    | 20160323 |
|                    |              | 24/25   | Fig4D    | 20160527 |
|                    |              | 26/25   | Fig4D    | 20160527 |
|                    | 3 16p        | L17/18  | Fig4D    | 20160323 |
|                    |              | 17/18   | Fig4D    | 20160527 |
|                    |              | 24/25   | Fig4D    | 20160527 |
|                    | 3 TMEM132D E | 24/25   | Fig4A    | 20151028 |
|                    |              | 25/26   | Fig4A    | 20151028 |
|                    |              | 25/26   | Fig4A    | 20151028 |
|                    | TMEM132C E   | 25/26   | Fig4A    | 20161104 |
|                    |              | 25/26   | Fig4A    | 20161104 |
|                    |              | 25/26   | Fig4A    | 20161104 |
|                    | 4 RIMBP2     | 15/16   | Fig4A    | 20160411 |
|                    |              | 17/18   | Fig4A    | 20160411 |
|                    |              | 24/25   | Fig4A    | 20160411 |
|                    |              | 25/26   | Fig4A    | 20160411 |
|                    | 4 PTPRN2     | 17/18   | Fig4A    | 20160411 |
|                    |              | 25/26   | Fig4A    | 20160411 |
|                    |              | 17/18   | Fig4A    | 20160420 |
|                    |              | 17/18   | Fig4A    | 20160224 |
|                    | 4 AJAP1      | 17/18   | Fig4A    | 20160420 |
|                    | 15/16        | Fig4A   | 20160224 |          |
|                    | 17/18        | Fig4A   | 20160224 |          |
|                    | 17/18        | Fig4A   | 20160825 |          |
| 3 STX2             | 15/16        | Fig4A   | 20160224 |          |
|                    | 17/18        | Fig4A   | 20160224 |          |
|                    | 15/16        | Fig4A   | 20160311 |          |
| 3 PRDM16           | 17/18        | Fig4A   | 20160411 |          |
|                    | 15/16        | Fig4A   | 20160224 |          |
|                    | 17/18        | Fig4A   | 20160420 |          |
| <b>NPC Subtel</b>  | 4 TMEM132D € | 17/18   | Fig4A    | 20151109 |
|                    |              | 15/16   | Fig4A    | 20160429 |
|                    |              | 15/16   | Fig4A    | 20150226 |
|                    |              | 17/18   | Fig4A    | 20150226 |
|                    | 3 TMEM132C   | 17/18   | Fig4A    | 20151109 |
|                    |              | 15/16   | Fig4A    | 20161103 |
|                    |              | 17/18   | Fig4A    | 20161103 |
|                    | 3 RIMBP2     | 17/18   | Fig4A    | 20160429 |
|                    |              | 17/18   | Fig4A    | 20160429 |
|                    |              | 17/18   | Fig4A    | 20160429 |

|                    |        |            |         |          |          |
|--------------------|--------|------------|---------|----------|----------|
| <b>Neuron Subt</b> | 3      | PTPRN2     | 17/18   | Fig4A    | 20160429 |
|                    |        |            | 17/18   | Fig4A    | 20160429 |
|                    |        |            | 17/18   | Fig4A    | 20160429 |
|                    | 3      | AJAP1      | 17/18   | Fig4A    | 20160429 |
|                    |        |            | 17/18   | Fig4A    | 20160429 |
|                    |        |            | 17/18   | Fig4A    | 20160502 |
|                    | 4      | STX2       | 17/18   | Fig4A    | 20160429 |
|                    |        |            | 17/18   | Fig4A    | 20160429 |
|                    |        |            | 17/18   | Fig4A    | 20160429 |
|                    |        |            | 17/18   | Fig4A    | 20160502 |
|                    | 4      | PRDM16     | 17/18   | Fig4A    | 20160429 |
|                    |        |            | 17/18   | Fig4A    | 20160429 |
|                    |        |            | 17/18   | Fig4A    | 20160429 |
|                    |        |            | 17/18   | Fig4A    | 20160502 |
|                    | 4      | TMEM132D E | P15/16  | Fig4A    | 20160323 |
|                    |        |            | P16/17  | Fig4A    | 20160323 |
|                    |        |            | L15/16  | Fig4A    | 20160323 |
|                    |        |            | L17/18  | Fig4A    | 20160323 |
|                    | 3      | TMEM132C E | 24/25   | Fig4A    | 20160527 |
|                    |        |            | 17/18   | Fig4A    | 20160527 |
|                    |        |            | 25/26   | Fig4A    | 20160825 |
|                    | 4      | RIMBP2     | L17/L18 | Fig4A    | 20160218 |
|                    |        |            | P15/P16 | Fig4A    | 20160218 |
|                    |        |            | 24/25   | Fig4A    | 20160218 |
|                    |        |            | 25/26   | Fig4A    | 20160218 |
|                    | 5      | PTPRN2     | 24/25   | Fig4A    | 20160527 |
|                    |        |            | 24/26   | Fig4A    | 20160527 |
|                    |        |            | 24/25   | Fig4A    | 20160527 |
|                    |        |            | 24/26   | Fig4A    | 20160527 |
|                    |        |            | 17/18   | Fig4A    | 20160527 |
| 5                  | AJAP1  | L15/L16    | Fig4A   | 20160218 |          |
|                    |        | P15/P16    | Fig4A   | 20160218 |          |
|                    |        | 3mt P15/16 | Fig4A   | 20160810 |          |
|                    |        | 3mt P17/18 | Fig4A   | 20160810 |          |
|                    |        | 3mt 24/25  | Fig4A   | 20160810 |          |
| 4                  | STX2   | L15/16     | Fig4A   | 20160218 |          |
|                    |        | L17/L18    | Fig4A   | 20160218 |          |
|                    |        | P15/P16    | Fig4A   | 20160218 |          |
|                    |        | P17/P18    | Fig4A   | 20160218 |          |
| 3                  | PRDM16 | L17/L18    | Fig4A   | 20160218 |          |
|                    |        | P15/P16    | Fig4A   | 20160218 |          |
|                    |        | P17/P18    | Fig4A   | 20160218 |          |

|        | N (biological replicates) | Telomere qPCR Sample | Corresponding | Date of Experiments |          |
|--------|---------------------------|----------------------|---------------|---------------------|----------|
| HIPS   | 3                         | Telomere             | 15/16         | Fig5A               | 20160503 |
|        |                           |                      | 15/16         | Fig5A               | 20160506 |
|        |                           |                      | 15/16         | Fig5A               | 20160328 |
| NPC    | 4                         | Telomere             | 15/16         | Fig5A               | 20160516 |
|        |                           |                      | 17/18         | Fig5A               | 20160516 |
|        |                           |                      | 24/25         | Fig5A               | 20160516 |
|        |                           |                      | 17/18         | Fig5A               | 20150421 |
| Neuron | 3                         | Telomere             | 15/16         | Fig5A               | 20160405 |
|        |                           |                      | 17/18         | Fig5A               | 20160405 |
|        |                           |                      | 17/18         | Fig5A               | 20160415 |
